1 **Asymmetric peptidoglycan editing generates the curvature of predatory**  
2 **bacteria, optimizing invasion and replication within a spherical prey**  
3 **niche**

4 Emma J. Banks<sup>1</sup>, Mauricio Valdivia-Delgado<sup>2</sup>, Jacob Biboy<sup>3</sup>, Amber Wilson<sup>2</sup>, Ian T. Cadby<sup>2</sup>,  
5 Waldemar Vollmer<sup>3</sup>, Carey Lambert<sup>1</sup>, Andrew L. Lovering<sup>2\*</sup>, R. Elizabeth Sockett<sup>1\*</sup>

6 \*corresponding authors:

7 liz.sockett@nottingham.ac.uk +44 (07851775626)

8 a.lovering@bham.ac.uk +44 (07933950457)

9

10 Author affiliations:

11 <sup>1</sup>Medical School, School of Life Sciences, University of Nottingham, Queen's Medical  
12 Centre, Nottingham, NG7 2UH, UK

13 <sup>2</sup>Institute for Microbiology and Infection, School of Biosciences, University of Birmingham,  
14 Birmingham, B15 2TT, UK

15 <sup>3</sup>Center for Bacterial Cell Biology, Biosciences Institute, Newcastle University, Newcastle  
16 upon Tyne, NE2 4AX, UK

17

18

19

20

21

22

23

24 **Abstract**

25 The vibrioid predatory bacterium *Bdellovibrio bacteriovorus* secretes prey wall-  
26 modifying enzymes to invade and replicate within the periplasm of Gram-negative prey  
27 bacteria. Studying self-modification of predator wall peptidoglycan during predation,  
28 we discover that Bd1075 generates self-wall curvature by exerting LD-  
29 carboxypeptidase activity in the vibrioid *B. bacteriovorus* strain HD100 as it grows  
30 inside spherical prey. Bd1075 localizes to the outer curved face of *B. bacteriovorus*, in  
31 contrast to most known shape-determinants. Asymmetric protein localization is  
32 determined by the novel function of a nuclear transport factor 2-like (NTF2) domain at  
33 the protein C-terminus. The solved structure of Bd1075 is monomeric, with key  
34 differences to other LD-carboxypeptidases. Rod-shaped  $\Delta bd1075$  mutants invade  
35 prey more slowly than curved wild-type predators, and stretch and deform the invaded  
36 prey cell from within. Vibrioid morphology increases the evolutionary fitness of wild  
37 predatory bacteria, facilitating efficient prey invasion and intracellular growth of curved  
38 predators inside a spherical prey niche.

39

40

41

42

43

44

45

46

## 47 **Introduction**

48 *Bdellovibrio bacteriovorus* HD100 is a small, vibrioid-shaped predatory bacterium  
49 which invades and then replicates within the periplasm of Gram-negative prey  
50 bacteria, forming a spherical structure called a prey bdelloplast<sup>1</sup>. *B. bacteriovorus* has  
51 a broad prey range which includes multidrug-resistant pathogens with variable outer  
52 membrane and cell wall chemistries, and occurrence of genetic resistance to *B.*  
53 *bacteriovorus* has never been observed in prey bacteria<sup>2, 3</sup>. Predatory *B. bacteriovorus*  
54 can also successfully clear pathogen infections within a range of *in vivo* animal  
55 models<sup>4, 5, 6</sup> and therefore has considerable and growing potential as a novel  
56 antimicrobial therapeutic.

57 The predation process is critically dependent upon the modification of both predator  
58 and prey peptidoglycan (PG) cell walls to facilitate the dual bacterial encounter. PG  
59 forms a complex macromolecular structure called a sacculus which surrounds the  
60 cytoplasmic membrane of nearly all bacteria, maintaining cell shape and providing  
61 protection against lysis due to osmotic pressure fluctuations and large extracellular  
62 toxins<sup>7</sup>. Bacterial growth, cell division, and – importantly in this study – predation, occur  
63 through PG remodeling which involves a repertoire of predator-secreted modifying  
64 enzymes<sup>8, 9, 10, 11</sup>.

65 The predatory lifecycle of *B. bacteriovorus* begins with attack-phase cells which swim<sup>12</sup>  
66 or glide<sup>13</sup> to encounter prey, then recognize and attach to the prey outer membrane.  
67 An entry porthole in the prey cell wall is created, through which the predator traverses  
68 to enter the inner periplasmic compartment<sup>10</sup>. Concurrently, two predator DD-  
69 endopeptidases are secreted into prey, cleaving cross-links between prey PG peptide  
70 chains to sculpt rod-shaped prey cells into spherical bdelloplasts<sup>8</sup>. This also reduces

71 the frequency of sequential predator invasions, thus conferring exclusivity to the first-  
72 entering predator<sup>8</sup>. The porthole in the wall and outer membrane is then re-sealed and  
73 the predator secretes hydrolytic enzymes including nucleases and proteases into the  
74 cytoplasm of the now-dead host, taking up the nutrient-rich degradative products<sup>14, 15</sup>.  
75 Prey-derived and *de novo*-synthesized nucleotides are incorporated into the  
76 replicating genome copies of the predator, which grows as an elongating multi-  
77 nucleoid filament inside the rounded but intact prey until exhaustion of prey nutrients<sup>16</sup>.  
78 Synchronous septation of the predator filament yields progeny cells which secrete  
79 targeted PG hydrolytic enzymes to lyse the prey host and re-initiate the predatory  
80 cycle<sup>11</sup>.

81 PG hydrolases have an additional role generally in the determination of cell shape<sup>17</sup>,  
82 which has been particularly studied in the non-predatory,  $\epsilon$ -proteobacteria  
83 *Helicobacter pylori*<sup>18, 19, 20</sup> and *Campylobacter jejuni*<sup>21, 22, 23</sup>, in whom multiple PG  
84 hydrolases collectively generate helical morphology. In contrast, bacterial vibrioid  
85 morphology is generally determined by non-enzymatic cyto- or periskeletal proteins  
86 (well-studied in *Caulobacter crescentus*<sup>24, 25</sup> and *Vibrio cholerae*<sup>26</sup>).

87 Despite the characterization of predator enzymes which modify the prey PG, there  
88 have been very few studies concerning the cell wall PG architecture or vibrioid cell  
89 shape of predatory bacteria. Here, we investigate the mechanism by which a curved,  
90 vibrioid predator is generated and ask whether there are evolutionary and functional  
91 connections between predator cell morphology and an efficient predatory lifestyle.

92 We identify and characterize the first predatory cell shape-determinant: Bd1075, which  
93 is targeted to the outer convex cell face by its C-terminal nuclear transport factor 2-  
94 like (NTF2) domain, where it exerts localized LD-carboxypeptidase (LD-CPase)

95 activity upon the *B. bacteriovorus* PG wall to generate curvature and the classical  
96 vibrio shape. The Bd1075 protein has some novel features in comparison to other LD-  
97 CPases, being monomeric with a C-terminal extension to the NTF2 domain binding  
98 pocket. We discover that rod-shaped  $\Delta bd1075$  mutant predators invade prey more  
99 slowly than the curved wild-type and stretch and deform the prey cell bdelloplast while  
100 growing within, unlike the curved wild-type. We further note that there is dynamic  
101 adaptation to the spherical prey niche; both curved wild-type and rod-shaped  $\Delta bd1075$   
102 mutant predators temporarily adopt a curve while growing inside the spherical prey  
103 bdelloplast, however only wild-type predators exit prey with a permanent vibrioid  
104 shape.

105 Our findings suggest that the evolution of a vibrioid cell shape confers two fitness  
106 advantages to *B. bacteriovorus* predators: rapid prey entry and optimal replication  
107 within a spherical intra-bacterial niche. This discovery also implies a possible scenario  
108 in which cell curvature may first be “templated” by predatory growth inside a  
109 spherically-shaped structure, then sensed and permanently “fixed” by PG shape-  
110 determining enzymes.

111

112

113

114

115

116

117

## 118 Results

### 119 **Bd1075 generates the curvature of *B. bacteriovorus* predators**

120 The monocistronic *bd1075* gene of vibrioid-shaped *B. bacteriovorus* Type strain  
121 HD100 encodes a 329 amino acid hypothetical protein with a predicted N-terminal sec  
122 signal peptide<sup>27</sup>, suggestive of protein translocation into the periplasm or secretion  
123 from the cell (Supplementary Fig. 1). Bd1075 shares limited homology with Csd6  
124 (identity: 24%, similarity: 38%) and Pgp2 (identity: 25%, similarity: 40%) which are  
125 dimeric proteins important for the generation of helical cell shape in *H. pylori*<sup>18, 28</sup> and  
126 *C. jejuni*<sup>21</sup>, respectively. These comparisons led us to hypothesize that Bd1075 could  
127 fulfill a role in the shape-determination of vibrioid predator *B. bacteriovorus*.

128 Reverse-transcriptase PCR (RT-PCR) revealed that *bd1075* is constitutively  
129 transcribed throughout the predatory cycle, suggesting that the protein may have a  
130 role in *B. bacteriovorus* rather than a secreted predatory function (Supplementary Fig.  
131 2).

132 A markerless deletion of *bd1075* in the curved *B. bacteriovorus* Type strain HD100  
133 could still be cultured predatorily (phenotype differences further detailed later) but  
134  $\Delta bd1075$  mutant cells had a distinct straight rod-shaped morphology unlike the curved  
135 wild-type HD100 parent strain (Fig. 1a-b). Wild-type mean curvature was significantly  
136 higher than the  $\Delta bd1075$  mutant (0.61 A.U.  $\pm$  SD 0.33 *versus* 0.17 A.U.  $\pm$  SD 0.22,  
137 respectively,  $p < 0.0001$ ; Fig. 1c). Plasmid-based complementation of  $\Delta bd1075$  with the  
138 wild-type *bd1075*<sub>HD100</sub> gene increased curvature relative to the  $\Delta bd1075$  mutant (Fig.  
139 1c). These results indicate that Bd1075 has a role in generating the curvature of *B.*  
140 *bacteriovorus*.

141

142 ***A lab-evolved predator strain that cannot generate cell curvature***

143 The straight rod morphology of  $\Delta bd1075$  resembles the long-cultured laboratory strain  
144 *B. bacteriovorus* 109J which was isolated in the 1960s and is the only reported non-  
145 vibrioid strain of *B. bacteriovorus*<sup>1</sup>. As *bd1075* is conserved in all *B. bacteriovorus*  
146 strains including 109J and appears to be a curvature-determinant, we queried why  
147 strain 109J is non-vibrioid. Despite otherwise 100% sequence identity with  
148 *bd1075*<sub>HD100</sub>, *bd1075*<sub>109J</sub> contains an in-frame N-terminal truncation of 57 amino acids  
149 (Pro-18 to Tyr-74) (Supplementary Fig. 3a-c). RT-PCR confirmed that *bd1075*<sub>109J</sub> is  
150 expressed in attack-phase cells and that the RNA transcript contains the predicted  
151 truncation (Supplementary Fig 3d). To test whether the N-terminal truncation may  
152 render the translated protein non-functional in curvature-determination, we cross-  
153 expressed *bd1075*<sub>109J</sub> in the HD100  $\Delta bd1075$  mutant and this did not complement  
154 curvature (Supplementary Fig. 4). In contrast, cross-expression of *bd1075*<sub>HD100</sub> in wild-  
155 type 109J significantly increased the curvature of strain 109J (0.34 A.U.  $\pm$  SD 0.26  
156 *versus* 0.22 A.U.  $\pm$  SD 0.21, respectively,  $p < 0.0001$ ; Supplementary Fig 4)

157 These results show that *Bd1075* is the curvature-determinant of vibrioid *B.*  
158 *bacteriovorus* strains, and that an inactivating mutation within the gene resulted in the  
159 lab-evolved strain 109J which is unable to generate cell curvature.

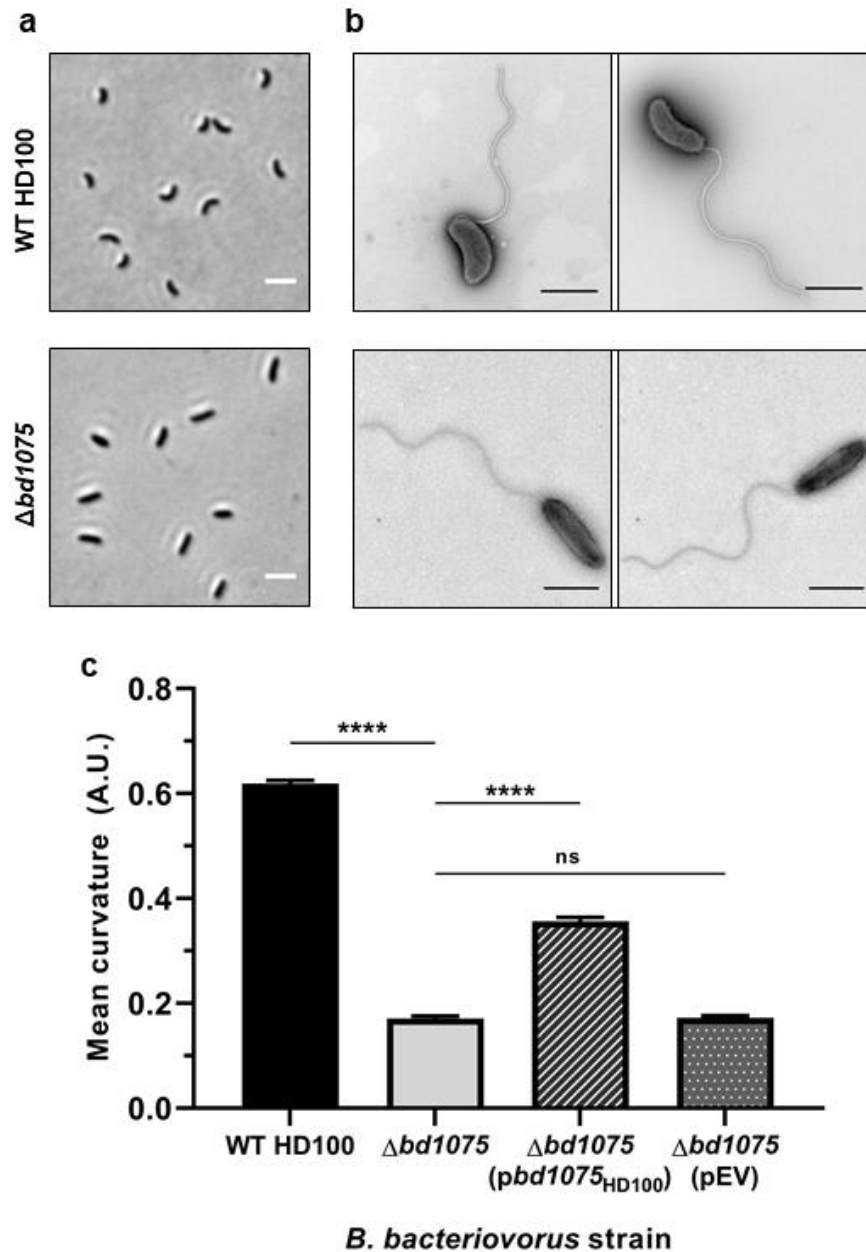

**Fig. 1** Bd1075 generates the curvature of *B. bacteriovorus* HD100 predator cells.

**a** Phase-contrast images of attack-phase *B. bacteriovorus* cells showing the curvature of wild-type (WT) HD100 cells in comparison to non-vibrioid  $\Delta bd1075$  cells. Images are representative of cells from at least 5 biological repeats. Scale bars = 2  $\mu$ m. **b** Transmission electron micrographs of WT HD100 and  $\Delta bd1075$  cells stained with 0.5% uranyl acetate. Scale bars = 1  $\mu$ m. Images are representative of 3 biological repeats. **c** Curvature measurements of *B. bacteriovorus* attack-phase cells.  $n = 1920$ - $2503$  cells per strain from 3 biological repeats. Error bars represent standard error of the mean. ns: non-significant ( $p > 0.05$ ), \*\*\*\*:  $p < 0.0001$ ; Kruskal-Wallis test. Frequency distributions are included in Supplementary Fig. 5a.



160 **Rod-shaped  $\Delta bd1075$  predators invade prey more slowly than the curved wild-**  
161 **type**

162 As cell morphology can be phenotypically important in other bacteria, we asked  
163 whether the curved shape of *B. bacteriovorus* could be advantageous to the bacterial  
164 predator during its unique intraperiplasmic lifecycle. Comparison of the gross  
165 predation efficiency of wild-type and  $\Delta bd1075$  predators upon *E. coli* prey in either  
166 liquid culture, or on pre-grown *E. coli* biofilms, did not reveal a significant difference  
167 (Supplementary Fig. 6 and Supplementary Fig. 7). However, these are laboratory  
168 conditions with readily-available prey and in which multiple important factors required  
169 to locate and navigate towards prey (e.g. predator chemotaxis and locomotion) are  
170 operational in bringing predators close to the prey surface.

171 We considered that predator morphology may fulfill an important role at the interface  
172 of single predator-prey encounters and therefore studied predation more closely at the  
173 single-cell level using time-lapse microscopy to visualize individual predatory invasion  
174 events. *B. bacteriovorus* HD100 wild-type or  $\Delta bd1075$  strains were mixed with *E. coli*  
175 S17-1 and placed under a microscope which captured images of specific fields of view  
176 every 1 min until the majority of *E. coli* prey had been invaded. Hypothesizing that  
177 curvature may affect the invasion of *B. bacteriovorus* into prey, we measured two  
178 parameters: prey attachment time and prey entry time (Fig. 2a). Duration of prey  
179 attachment did not significantly differ ( $p = 0.46$ ) between the wild-type (29.3 min  $\pm$  SD  
180 5.0) and  $\Delta bd1075$  (29.6 min  $\pm$  SD 4.8) (Fig. 2b), however there was a significant  
181 difference ( $p < 0.0001$ ) between the rates at which wild-type and  $\Delta bd1075$  entered prey:  
182 4.3 min  $\pm$  SD 0.9 versus 6.1 min  $\pm$  SD 1.7, respectively (Fig. 2c). Moreover, the longest  
183 wild-type entry was a single 7 min invasion, whereas 35.6% of  $\Delta bd1075$  entry  
184 invasions were  $\geq 7$  min, with the longest invasion lasting 14 min.

185 These data indicate that *B. bacteriovorus* vibrioid morphology facilitates the traversal  
186 of predators across the prey cell envelope into the intraperiplasmic compartment of  
187 the rounded prey cell.

188

189

190

191

192

193

194

195

196

197

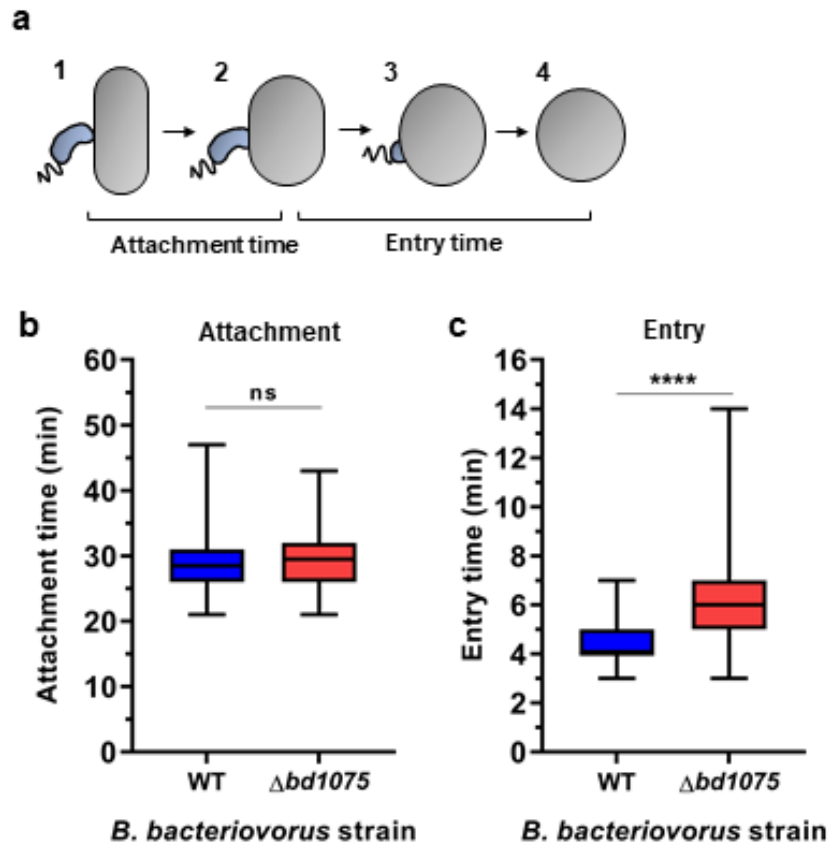

**Fig. 2 Prey attachment and entry times of *B. bacteriovorus* wild-type and  $\Delta bd1075$ .**

**a** Schematic to illustrate the measurement of attachment and entry times. Attachment time: number of frames (1 frame = 1 min) between initial predator attachment to prey and the first sign of predator entry into prey (stages 1-2). Entry time: number of frames between the first sign of predator entry and the predator residing completely inside the prey bdelloplast (stages 2-4). **b** Duration of attachment to and **c** entry into *E. coli* S17-1 prey by *B. bacteriovorus* HD100 wild-type (WT) and  $\Delta bd1075$ , measured by time-lapse microscopy. n = 90 cells in total from 3 biological repeats. Box: 25<sup>th</sup> to 75<sup>th</sup> percentiles; whiskers: range min-max; box line: median; ns: non-significant (p>0.05); \*\*\*\*: p<0.0001; Mann-Whitney test.

198

199

200

201

202 **Prey bdelloplasts are stretched and deformed by replicating, non-curved**  
203 **predators**

204 Having observed that the non-vibrioid  $\Delta bd1075$  mutant was slower to enter the prey  
205 periplasm than the curved wild-type, we next investigated the growth and replication  
206 of  $\Delta bd1075$  within prey. During prey invasion, *B. bacteriovorus* secretes two DD-  
207 endopeptidases, Bd0816 and Bd3459, into the prey periplasm which hydrolyze the  
208 peptide bonds connecting chains of polysaccharide backbone<sup>8</sup>. The prey PG wall  
209 becomes more malleable and the cell rounds up into a spherical bdelloplast.

210 We hypothesized that growth of the straight rod-shaped  $\Delta bd1075$  within spherical  
211 bdelloplasts may be deleterious to the predatory niche, whereas curved wild-type cells  
212 may better “fit” into the curvature of the bdelloplast during growth and elongation. A C-  
213 terminal mCerulean3 fusion to the continuously-expressed cytoplasmic protein  
214 Bd0064<sup>6, 29</sup> was introduced via single-crossover recombination into both wild-type  
215 HD100 and  $\Delta bd1075$  to label the predator cytoplasm blue and allow visualization of *B.*  
216 *bacteriovorus* within prey. Fluorescent *B. bacteriovorus* strains were mixed with *E. coli*  
217 S17-1 pZMR100 and observed throughout the predatory cycle. Wild-type predators  
218 elongated as tightly curved filaments inside bdelloplasts (Fig. 3a), however the rod-  
219 shaped  $\Delta bd1075$  mutant - despite becoming more curved by the spherical bdelloplast  
220 environment over time (Fig. 3b) - elongated as a less tightly curved filament and then  
221 septated to give rod-shaped, non-vibrioid progeny cells (Fig. 3a). Strikingly, a sub-set  
222 of  $\Delta bd1075$  predator cells appeared to stretch and deform the usually spherical prey  
223 bdelloplasts during intra-bacterial growth (Fig. 3c).

224 Measuring the morphology of bdelloplasts containing a single *B. bacteriovorus*  
225 predator between 1 h and 2.5 h after predator-prey mixing showed that from 1 h - 2 h,

226 the shape of prey bdelloplasts did not obviously differ between the two strains.  
227 However, at 2.5 h when *B. bacteriovorus* cells are nearing maximal growth, the  
228 morphology of prey bdelloplasts became markedly different. The area of each  
229 bdelloplast containing a  $\Delta bd1075$  mutant predator ( $1.87 \mu\text{m}^2 \pm \text{SD } 0.57$ ) was  
230 significantly higher than bdelloplasts containing wild-type predators ( $1.69 \mu\text{m}^2 \pm \text{SD}$   
231  $0.32$ ,  $p < 0.01$ ; Fig. 3d) and the circularity was significantly lower ( $\Delta bd1075$ :  $0.98 \text{ A.U.}$   
232  $\pm \text{SD } 0.04$ ; wild-type:  $0.99 \text{ A.U.} \pm \text{SD } 0.01$ ,  $p < 0.05$ ; Fig. 3e). Bdelloplasts containing  
233  $\Delta bd1075$  predators were also significantly longer ( $1.65 \mu\text{m} \pm \text{SD } 0.36$ ,  $p < 0.01$ ; Fig. 3f)  
234 than those containing curved wild-type predators ( $1.54 \mu\text{m} \pm \text{SD } 0.18$ ) but the width  
235 did not significantly differ ( $\Delta bd1075$ :  $1.38 \mu\text{m} \pm \text{SD } 0.13$ ; wild-type:  $1.35 \mu\text{m} \pm \text{SD } 0.09$ ,  
236  $p > 0.05$ ; Fig. 3g), consistent with the visual appearance of “stretched” bdelloplasts.  
237 Collectively, these findings show that curved *B. bacteriovorus* wild-type cells have an  
238 “optimal fit” into the curvature of the bdelloplast, whereas the shape of rod-shaped  
239 predators can result in severe deformation of the spherical prey niche.

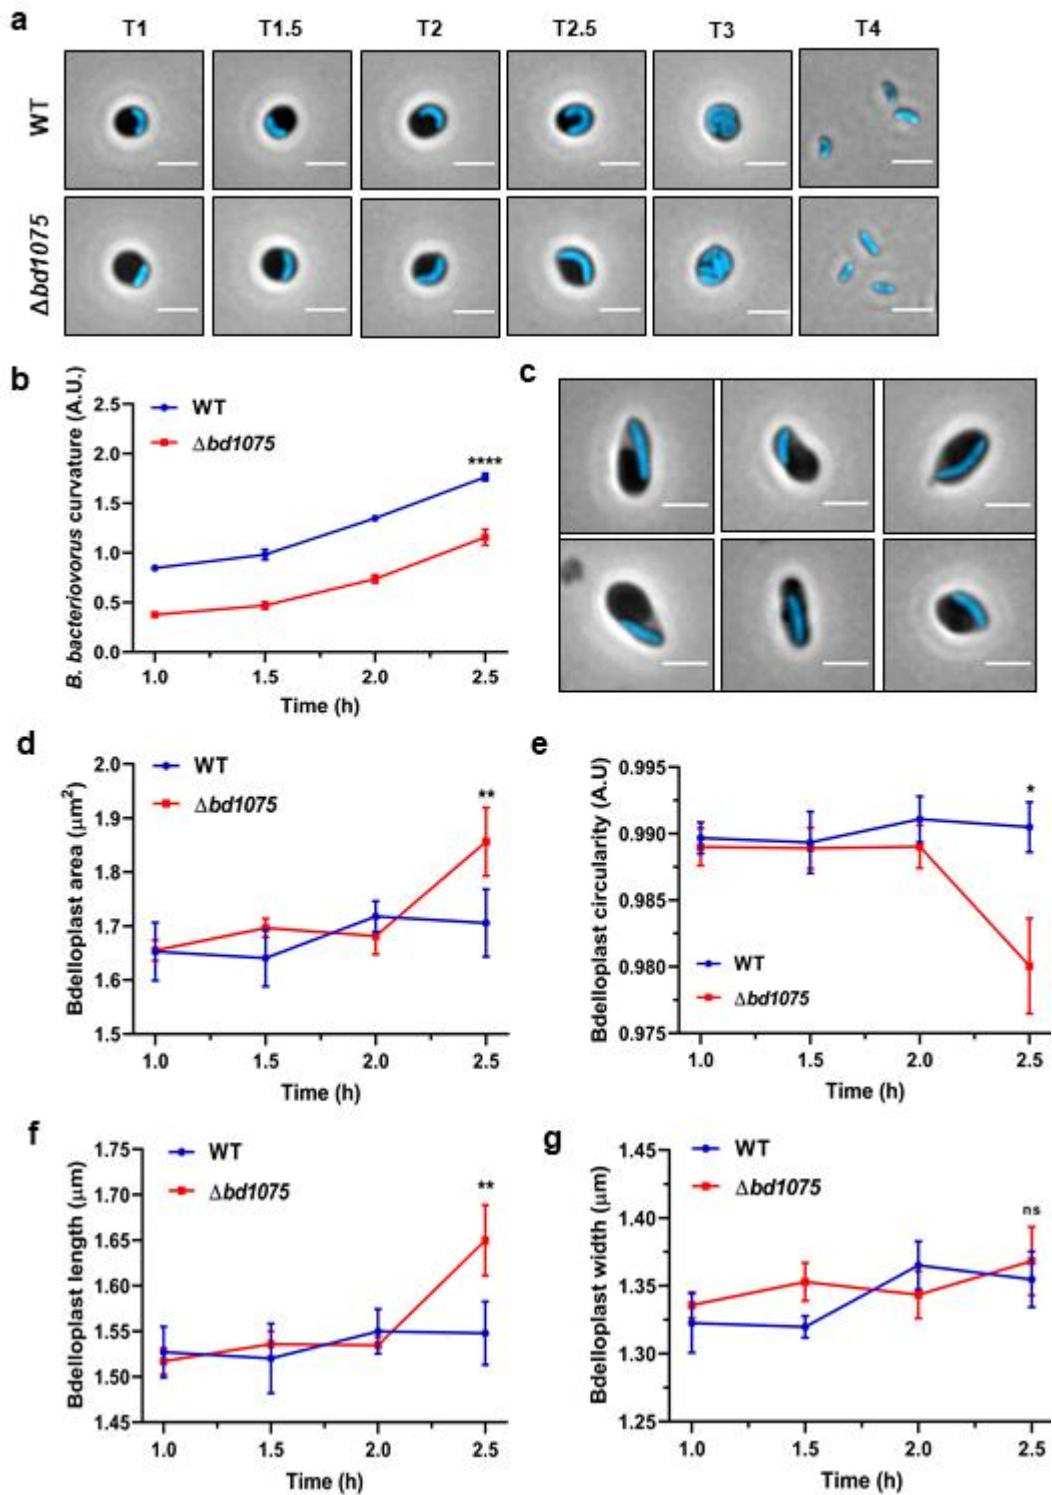

**Fig. 3 Intra-bacterial growth and bdelloplast topology effects of *B. bacteriovorus* strains.**

**a** Growth of *B. bacteriovorus* wild-type (WT) and  $\Delta bd1075$  strains inside *E. coli* S17-1 pZMR100 prey bdelloplasts. *B. bacteriovorus* strains express the cytoplasmic fusion protein Bd0064-mCerulean3 to allow visualization of intraperiplasmic predator cells. T = hours elapsed since predators and prey were mixed. Scale bars = 2  $\mu\text{m}$ . Images are representatives of cells from 3 biological repeats. **b**

Curvature of *B. bacteriovorus* WT and  $\Delta bd1075$  strains during predation upon *E. coli* S17-1 pZMR100 as depicted in (a). n = 134-250 cells per strain and per timepoint from 3 biological repeats. Error bars represent standard error of the mean. \*\*\*\*:  $p < 0.0001$ ; Mann-Whitney test. c Examples of  $\Delta bd1075$  cells which appear to stretch and deform the *E. coli* prey bdelloplast at T = 2.5 h during 3 repeats of predatory timecourses as shown in (a). Scale bars = 2  $\mu\text{m}$ . d Area, e circularity, f length and g width of *E. coli* prey bdelloplasts during predation by WT or  $\Delta bd1075$  predators. n = 134-250 cells per strain and per timepoint from 3 biological repeats. Error bars represent standard error of the mean. ns: non-significant ( $p > 0.05$ ); \*\*:  $p < 0.01$ , \*:  $p < 0.05$ ; Mann-Whitney test.

240

241

242

243

244

245

246

247

248

249

250

251

252

253

254

255

256

257

258

259

260 **Bd1075 demonstrates LD-carboxypeptidase activity on PG sacculi *in vivo* and**  
261 ***in vitro***

262 Bd1075 contains a predicted LD-transpeptidase (LDT) catalytic domain  
263 (Supplementary Fig. 1c-d), however the LDT domains of related proteins Csd6 and  
264 Pgp2 function instead as LD-carboxypeptidases (LD-CPases) which remove the  
265 terminal D-alanine from a PG tetrapeptide (consisting of L-Ala, D-Glu, *meso*-Dap, and  
266 D-Ala) to generate a tripeptide (consisting of L-Ala, D-Glu, and *meso*-Dap)<sup>30</sup>. This  
267 highlighted the need to verify the catalytic activity (if any) of Bd1075. PG sacculi were  
268 therefore purified from *B. bacteriovorus* strains and analyzed by HPLC to determine  
269 their muropeptide composition and any changes to it caused by Bd1075.

270 In contrast to curved wild-type HD100 sacculi, rod-shaped  $\Delta bd1075$  sacculi contained  
271 a greater proportion of monomeric tetrapeptides (23.7%  $\pm$  0.8%) and cross-linked  
272 tetratetrapeptides (33.2%  $\pm$  0.7%) compared to the wild-type (9.6%  $\pm$  0.8% and 18.6%  
273  $\pm$  0.6%, respectively), and a complete absence of monomeric tripeptides and dimeric  
274 tetratripeptides (Fig. 4a-b and Table 1). This difference suggests that Bd1075 could  
275 cleave the C-terminal D-alanine of tetrapeptides to produce tripeptides which  
276 terminate with *meso*-Dap. The complemented strain  $\Delta bd1075$  ( $pbd1075_{HD100}$ )  
277 contained no monomeric tetrapeptides, 14.8%  $\pm$  1.2% tripeptides and 7.2%  $\pm$  0.5%  
278 dipeptides. These data suggest that re-introduction of the wild-type  $bd1075_{HD100}$  gene  
279 resulted in over-complementation beyond wild-type as all monomeric tetrapeptides  
280 have been cleaved to tripeptides, with some subsequently converted to dipeptides  
281 (Fig. 4c and Table 1).

282 In comparison, the muropeptide profile of strain  $\Delta bd1075$  ( $pbd1075_{109J}$ ), in which  
283 curvature was not complemented (Supplementary Fig. 4), did not differ from  $\Delta bd1075$ ,



284 further confirming the non-functionality of truncated Bd1075<sub>109J</sub> as an LD-CPase  
285 (Supplementary Fig. 8a and Supplementary Table 1).

286 Wild-type 109J had a very similar muropeptide profile to the  $\Delta bd1075$  mutant - a  
287 complete absence of tripeptides and tetratripeptides and a high proportion of  
288 monomeric tetrapeptides (28.0%  $\pm$  4.3%) and dimeric tetratetrapeptides (33.8%  $\pm$   
289 1.1%) (Supplementary Fig. 8b and Supplementary Table 1). Finally, the cross-  
290 complementation strain 109J (*pbd1075*<sub>HD100</sub>), with an increased mean curvature  
291 compared to the lab-cultured wild-type strain 109J (Supplementary Fig. 4), contained  
292 a higher proportion of monomeric tripeptides (18.7%  $\pm$  3.0%) and dimeric  
293 tetratripeptides (26.2%  $\pm$  0.6%), and a reduction in monomeric tetrapeptides and  
294 dimeric tetratetrapeptides (3.0%  $\pm$  0.8% and 8.8%  $\pm$  0.8%, respectively)  
295 (Supplementary Fig. 8c and Supplementary Table 1). This demonstrates that cross-  
296 expression of *bd1075*<sub>HD100</sub> in wild-type 109J resulted in enzymatic conversion of  
297 tetrapeptides to tripeptides and increased the curvature of this normally non-vibrioid  
298 strain.

299 To further validate the LD-CPase activity of Bd1075, an N-terminally His-tagged copy  
300 of *bd1075*<sub>HD100</sub> was expressed in *E. coli* BL21 and purified to near homogeneity by Ni-  
301 NTA affinity chromatography and size-exclusion chromatography. The muropeptide  
302 profile of *B. bacteriovorus* HD100  $\Delta bd1075$  sacculi incubated with purified Bd1075  
303 enzyme revealed a complete conversion of both monomeric tetrapeptides to  
304 tripeptides and dimeric tetratetrapeptides to tetratripeptides (Fig. 4e). Bd1075 had  
305 identical enzymatic activity on wild-type 109J straight rod sacculi and upon sacculi of  
306 wild-type *E. coli* BW25113, showing that the enzyme can act on PG from different  
307 bacterial strains and species (Supplementary Fig. 9b-c).

308 Theseuropeptide data determine that Bd1075 has LD-CPase activity on PG both *in*  
309 *vivo* and *in vitro*, removing C-terminal D-alanine residues linked to the L-center of  
310 *meso*-Dap to convert tetrapeptides to tripeptides.

311

312

313

314

315

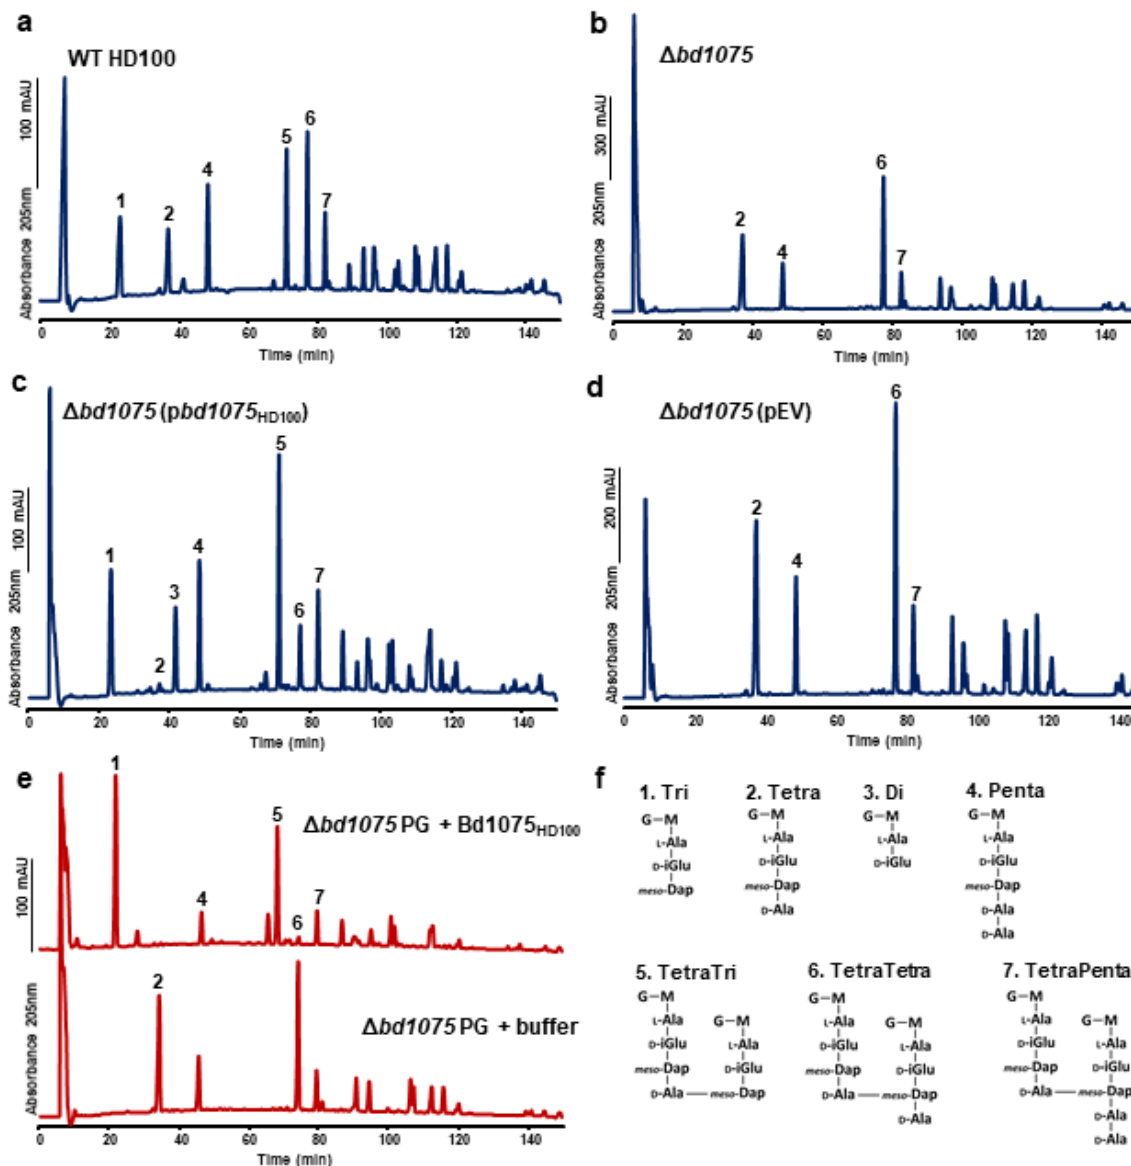

**Fig. 4 Muropeptide composition of *B. bacteriovorus* HD100**

**a-d** HPLC elution profiles of reduced muropeptides released from peptidoglycan sacculi isolated from attack-phase *B. bacteriovorus* HD100 cells. **a** Wild-type (WT) HD100, **b**  $\Delta bd1075$ , **c**  $\Delta bd1075$  ( $pbd1075_{HD100}$ ) -  $bd1075_{HD100}$  expressed in  $\Delta bd1075$ , and **d**  $\Delta bd1075$  (pEV) - empty vector control in  $\Delta bd1075$ . Representative chromatograms of 2 biological repeats are shown. **e** HPLC muropeptide elution profiles of  $\Delta bd1075$  sacculi treated with either purified  $Bd1075_{HD100}$  enzyme (above) or buffer control (below). Data are from 1 biological repeat. **f** Structural schematics of the seven primary muropeptide fractions. Numbers correspond to those above peaks in (**a-e**). G: *N*-acetylglucosamine, M: *N*-acetylmuramitol, L-Ala: L-alanine, D-Glu: D-glutamic acid, *meso*-Dap: *meso*-diaminopimelic

acid, D-Ala: D-alanine. Minor peaks are annotated in Supplementary Fig. 10 (for **a-d**) or Supplementary Fig. 9a (for **e**).

316

317

318

319

320

321

322

323

324

325

326

327

328

329

330

331

332

333

**Table 1. Quantification of muropeptides released from *B. bacteriovorus* HD100 sacculi.**

Values represent the relative percentage area of each muropeptide peak in **Fig. 4**. Numbers with an asterisk differ from WT HD100 by more than 30% and values that are additionally emboldened differ by more than 50%.

| Muropeptide               | Relative peak area (%) <sup>1</sup> in <i>B. bacteriovorus</i> strain |                    |                                          |                          |
|---------------------------|-----------------------------------------------------------------------|--------------------|------------------------------------------|--------------------------|
|                           | WT HD100                                                              | $\Delta bd1075$    | $\Delta bd1075$<br>( $pbd1075_{HD100}$ ) | $\Delta bd1075$<br>(pEV) |
| <b>Monomers</b>           |                                                                       |                    |                                          |                          |
| Tri                       | 14.4 ± 1.0                                                            | n.d. <sup>2</sup>  | 14.8 ± 1.2                               | n.d.*                    |
| Tetra                     | 9.6 ± 0.8                                                             | <b>23.7 ± 0.8*</b> | <b>0.6 ± 0.9*</b>                        | <b>23.1 ± 2.7*</b>       |
| Di                        | 2.1 ± 0.1                                                             | n.d.*              | <b>7.2 ± 0.5*</b>                        | n.d.*                    |
| Penta                     | 12.8 ± 2.5                                                            | 11.9 ± 3.6         | 12.2 ± 4.2                               | 14.8 ± 0.0               |
| Monomer anhydroMurNAc     | 2.2 ± 3.0                                                             | 2.3 ± 3.2          | 2.6 ± 3.7                                | 2.5 ± 3.6                |
| Monomers (Total)          | 38.9 ± 0.5                                                            | 35.6 ± 4.3         | 34.9 ± 2.6                               | 37.8 ± 2.6               |
| <b>Dimers</b>             |                                                                       |                    |                                          |                          |
| TetraTri                  | 14.9 ± 0.7                                                            | <b>0.5 ± 0.7*</b>  | <b>26.4 ± 1.5*</b>                       | n.d.*                    |
| TetraTetra                | 18.6 ± 0.6                                                            | <b>33.2 ± 0.7*</b> | <b>7.8 ± 1.4*</b>                        | <b>29.6 ± 4.7*</b>       |
| TetraPenta                | 12.2 ± 1.0                                                            | 12.5 ± 0.3         | 14.7 ± 2.9                               | 13.1 ± 0.2               |
| Dimer anhydroMurNAc       | 17.3 ± 0.8                                                            | 16.4 ± 0.6         | 20.5 ± 4.4                               | 17.0 ± 0.3               |
| Dimers (total)            | 45.6 ± 2.3                                                            | 46.1 ± 0.6         | 48.9 ± 2.9                               | 42.7 ± 4.5               |
| <b>Trimers</b>            |                                                                       |                    |                                          |                          |
| TetraTetraTri             | 1.6 ± 0.4                                                             | n.d.*              | <b>3.8 ± 0.2*</b>                        | n.d.*                    |
| TetraTetraTetra           | 6.9 ± 0.5                                                             | <b>11.2 ± 0.8*</b> | 4.9 ± 1.0                                | <b>10.6 ± 2.2*</b>       |
| TetraTetraPenta           | 6.9 ± 3.6                                                             | 7.1 ± 3.2          | 7.4 ± 4.3                                | 8.8 ± 4.0                |
| Trimer anhydroMurNAc      | 7.0 ± 0.3                                                             | 9.5 ± 1.0*         | 6.2 ± 1.3                                | 10.3 ± 1.0*              |
| Trimers (total)           | 15.4 ± 2.8                                                            | 18.3 ± 4.0         | 16.2 ± 5.5                               | 19.4 ± 1.8               |
| Dipeptides (total)        | 2.1 ± 0.1                                                             | n.d.*              | <b>7.2 ± 0.5*</b>                        | n.d.*                    |
| Tripeptides (total)       | 22.4 ± 0.6                                                            | <b>0.2 ± 0.3*</b>  | 29.3 ± 0.5*                              | n.d.*                    |
| Tetrapeptides (total)     | 54.3 ± 1.1                                                            | 79.3 ± 2.0*        | 41.4 ± 4.2                               | 75.7 ± 1.4*              |
| Pentapeptides (total)     | 19.0 ± 1.3                                                            | 18.2 ± 0.9         | 19.5 ± 0.6                               | 21.8 ± 5.0               |
| AnhydroMurNAc (total)     | 13.1 ± 3.3                                                            | 13.6 ± 2.6         | 14.9 ± 5.4                               | 14.5 ± 3.8               |
| Average chain length      | 7.9 ± 2.0                                                             | 7.5 ± 1.4          | 7.2 ± 2.6                                | 7.1 ± 1.9                |
| Degree of cross-linkage   | 33.1 ± 0.7                                                            | 35.3 ± 2.8         | 35.3 ± 2.2                               | 34.3 ± 1.0               |
| % peptides in cross-links | 61.1 ± 0.5                                                            | 64.4 ± 4.3         | 65.1 ± 2.6                               | 62.2 ± 2.6               |

<sup>1</sup> values are mean ± variation of two biological replicates.

<sup>2</sup> n.d., not detected.

334

335

### 336 **Bd1075 structure determination**

337 The structure of mature Bd1075 protein was determined to 1.34 Å (Fig. 5 and  
338 Supplementary Table 2). The Bd1075 structure contains two domains: the catalytic  
339 LD-CPase domain (aa 47-180) and a C-terminal nuclear transport factor 2 (NTF2)-like  
340 domain (aa 196-304) (Fig. 5a). Interestingly, although there was a global agreement  
341 in fold to Csd6 of *H. pylori* and Pgp2 of *C. jejuni* which also contain an NTF2 domain  
342 and an LD-CPase domain (the junction between the two at residue 188 of Bd1075),  
343 there were significant differences in fold elements and local regions. These differences  
344 resulted in an inability to solve Bd1075 via molecular replacement, necessitating the  
345 use of SAD phasing with co-crystallized halide ions. The Bd1075 protein is monomeric  
346 (the two molecules in the asymmetric unit contact one another by packing interactions  
347 only), lacking the dimerization regions of the other characterized LD-CPase proteins;  
348 this was supported by size exclusion data (Supplementary Fig. 11).

349 We were able to trace residues 29-308 with the exception of a presumably flexible  
350 region (aa 82-91) which we term the active site “lid”. Differences to other LD-CPase  
351 structures are distributed throughout the fold (and in a small shift in NTF2:LD-CPase  
352 juxtaposition) as demonstrated by RMSD values for the full-length/LD-CPase-  
353 alone/NTF2-alone of 2.5 / 2 / 1.8 Å for Csd6 and 2.8 / 1.9 / 2.2 Å for Pgp2. The large  
354 values of 2.5/2.8 Å for full-length RMSD are in contrast with the agreement of 1.8 Å  
355 between Csd6 and Pgp2, hence Bd1075 is the structural outlier of the three proteins.

356 Bd1075 has a consensus active site, with the superfamily conserved catalytic triad  
357 consisting of C156, H141 and A142, each present in the expected (presumed active)  
358 orientations (Fig. 5b). A142 is often a glycine residue in other LD-CPases but here it  
359 makes identical h-bonding contacts to H141 using backbone carbonyl atoms. Bd1075

360 active site pocket-forming residue V158 is a relative anomaly as this position is an  
361 arginine in most LD-transpeptidases or an alanine in Csd6/Pgp2 and YafK-like  
362 enzymes shown recently to cleave the cross-link between PG and Braun's  
363 lipoprotein<sup>31, 32</sup>. The termini of Bd1075 are very different to both Csd6 and Pgp2,  
364 replacing the N-terminal dimerization domain of those enzymes with a simple, shorter  
365 loop, and extending the C-terminus such that the Bd1075 NTF2 domain finishes with  
366 a longer beta-strand (aa 295-306) - residues of which contribute to its binding pocket  
367 (Fig. 5d-e). The C-terminus has a further 21 residues that we were unable to fit in this  
368 crystal form and which are predicted to be at least partly disordered.

369 Most noteworthy within the core of the Bd1075 C-terminus was the presence of W303  
370 which is clearly located within the substrate binding pocket of the NTF2 domain. W303  
371 is highly conserved amongst *Bdellovibrio* Bd1075 protein homologs but not found in  
372 other LD-CPase proteins (due to their shorter NTF2 sequences which terminate at a  
373 position equivalent to Bd1075<sup>E302</sup>). The crystal packing of Bd1075 was such that a two  
374 amino acid loop of P107/K108 from one Bd1075 monomer packed into the NTF2  
375 domain of the adjacent monomer. This loop is situated in an identical position to the  
376 bound glycerol of Csd6, postulated to be reminiscent of a substrate-like interaction<sup>28</sup>.  
377 Conserved residues of the Bd1075 NTF2 domain binding pocket pack around this  
378 feature (yellow in Fig. 5c), the base of which is formed by Y274 – an important residue  
379 in both our monomeric structure and other dimeric LD-CPases.

380 Having begun to probe the cellular localization of Bd1075 in *B. bacteriovorus*, we used  
381 this new structural information to aid in the construction of fluorescently-tagged  
382 Bd1075 truncations and point mutants for enzyme localization tests.

383

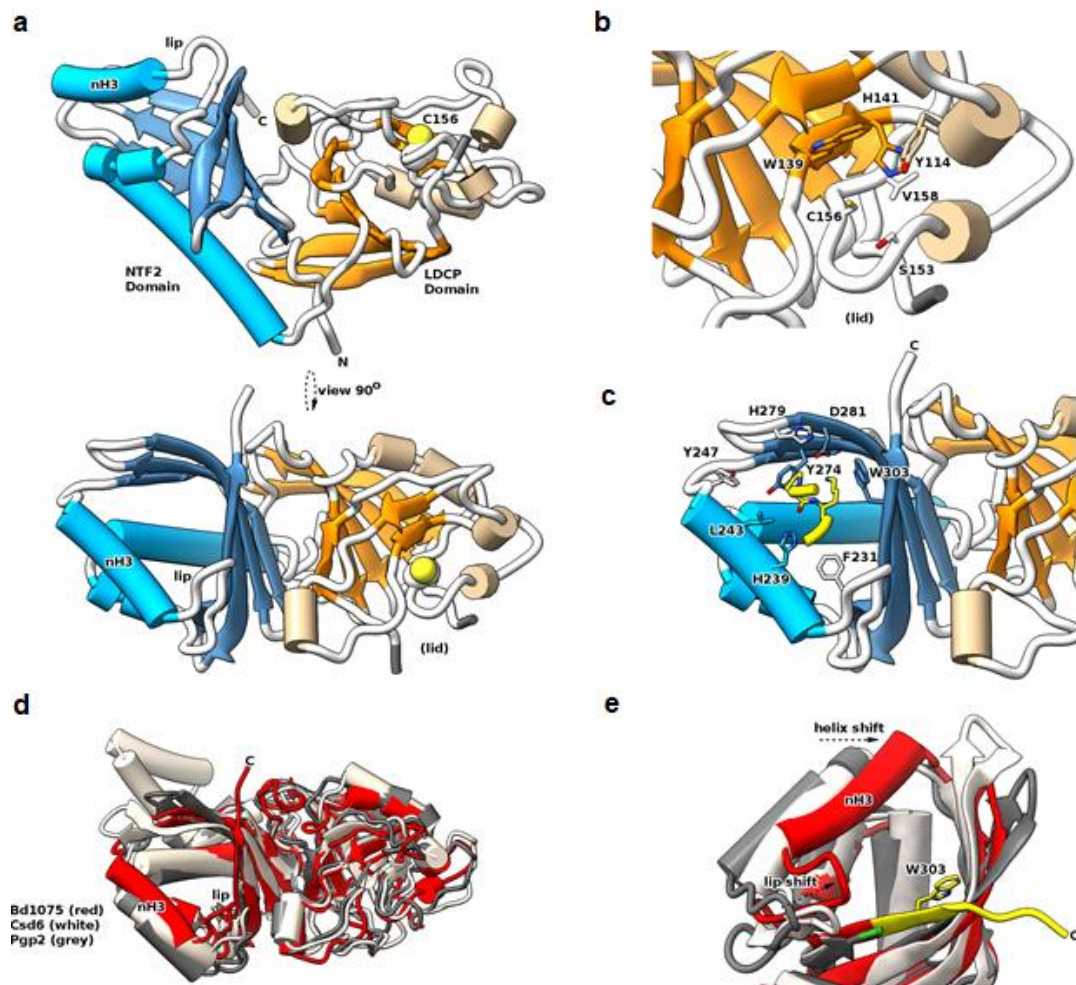

**Fig 5. Structure of Bd1075 and features different to other characterized LD-CPase enzymes.**

**a** Two orthogonal views of the Bd1075 fold, with catalytic residue C156 in space-fill form and features labeled. **b** Close-up view of the Bd1075 LD-CPase catalytic domain with selected residues that form the active site pocket displayed in stick form. **c** Close-up view of the Bd1075 NTF2 pocket, demonstrating complexation of a loop (residues 106-109 colored yellow, P107 and K108 in stick form) from a neighboring molecule in the crystal lattice. **d** Comparison of Bd1075 (red, 7O21), Csd6 (white, 4XZZ) and Pgp2 (gray, 6XJ6) structures. Helix 3 of the Bd1075 NTF2 domain (labeled “nH3”) and the associated loop (“lip”) are relatively closer to the NTF2 pocket than the respective features of Csd6/Pgp2. **e** Close-up of the NTF2 terminus from structural alignment in **(d)**, demonstrating the relative extension of the Bd1075 C-terminus (colored yellow, includes NTF2 pocket-forming residue W303) in comparison to the shorter Csd6/Pgp2 termini (end residue colored green). The relative shifts of the nH3 helix and lip loop to constrict the NTF2 pocket are denoted by dashed arrows.



385 **The C-terminal NTF2 domain of Bd1075 targets the protein to what becomes**  
386 **the outer convex cell face, and is required to generate curvature**

387

388 ***Localization and targeting of Bd1075 to the outer convex cell face***

389 To determine whether Bd1075 is broadly active over all *B. bacteriovorus* envelope PG  
390 or if activity is specifically localized, a double-crossover markerless strain in which  
391 mCherry is C-terminally fused to Bd1075 was constructed. Bd1075-mCherry localized  
392 to the outer convex face of *B. bacteriovorus* - both in free-swimming attack-phase cells  
393 (Fig. 6a) and throughout the predatory cycle (Supplementary Fig. 12). This contrasts  
394 with most characterized vibrioid cell shape-determinants in other bacteria such as  
395 *Caulobacter crescentus* and *Vibrio cholerae*, which typically localize to the inner  
396 concave face<sup>24, 26</sup>.

397 Moreover, unlike pole-associated proteins, the mechanism by which bacterial proteins  
398 are targeted to one of the cell lateral sides has not been described. Intrigued and partly  
399 informed by the protein structural data, we utilized the specifically-targeted Bd1075 to  
400 investigate how bacterial proteins might be targeted to just one lateral wall. We  
401 hypothesized that, in addition to the N-terminal signal peptide which targets the protein  
402 for translocation into the periplasm, Bd1075 may contain a second internal targeting  
403 sequence which directs the protein to just one side of the periplasm: the wall that  
404 becomes the outer curve. We therefore constructed five different protein variants of  
405 Bd1075 which were each C-terminally fused to mCherry (Fig. 6b). These constructs  
406 were then introduced into the *B. bacteriovorus* HD100 curved wild-type strain to  
407 generate single-crossover strains containing two copies of *bd1075*: the original wild-

408 type and the new mCherry fusion. The sub-cellular localization of each fusion protein  
409 was then examined by epifluorescence microscopy.

410 As expected, the full-length protein localized to (what becomes) the convex cell face  
411 (Fig. 6c) and we noted no morphological nor deleterious effects resulting from the  
412 presence of two functional copies of *bd1075*. The LD-CPase domain contains three  
413 conserved catalytic triad residues: His-141, Ala-142 and Cys-156. Mutation of Cys-  
414 156 to alanine (C156A) in full length Bd1075 did not abrogate localization, indicating  
415 that LD-CPase activity is not involved in targeting (Fig. 6c).

416 As the Bd1075 C-terminal NTF2 domain (aa 196-304) is from a very broad protein  
417 superfamily<sup>33</sup>, it was not possible to predict a putative function for this domain but the  
418 structure with the P107/K108 loop bound over the NTF2 pocket (Fig. 5c) suggested  
419 that this was a substrate interaction mimic and a means to destabilize putative PG  
420 substrate interactions. We tested a role for the NTF2 domain in protein targeting via  
421 the generation of three additional mCherry fusions: (1) Full-length Bd1075 containing  
422 an NTF2 domain point mutation changing Tyr-274 (which forms the base of the  
423 substrate-binding pocket, Fig. 5c) to alanine: Y274A; (2) Bd1075 truncated protein  
424 comprising residues 1-E302 (similar to the shorter Csd6 and Pgp2) which terminates  
425 2 residues prior to the completion of the NTF2 domain at A304, omitting the highly  
426 conserved W303 which the crystal structure had suggested to be a Bd1075-unique  
427 feature; and (3) Bd1075 truncated protein comprising residues 1-A304, completing the  
428 NTF2-like domain and including W303.

429 The Y274A and E302 truncated mutants (which both contain disruptions to the NTF2  
430 domain) failed to localize to the outer curve, however the A304 truncation mutant  
431 which contains a complete NTF2 domain (and *Bdellovibrio*-specific residue W303) was

432 correctly targeted (Fig. 6c). These results strongly supported the hypothesis that the  
433 NTF2 domain is involved in protein targeting to the PG side-wall (which becomes the  
434 convex cell face), and that the *Bdellovibrio*-specific NTF2 extension, including W303,  
435 is important for this function.

436

### 437 ***The role of protein targeting in the generation of curvature***

438 To investigate whether correct protein targeting is absolutely required to generate  
439 curvature, the five mCherry fusion constructs were introduced into the rod-shaped  
440  $\Delta bd1075$  mutant to generate single-crossover strains expressing solely the mCherry-  
441 tagged copy of *bd1075*. The sub-cellular localization and curvature of each fusion  
442 strain were examined. The full-length protein localized to (what becomes) the outer  
443 curve and completely complemented the curvature of  $\Delta bd1075$  (Fig. 6d-e). The LD-  
444 CPase catalytic domain point mutant C156A did not restore curvature and remained  
445 localized at the center of the rod-shaped cell (Fig. 6d-e). Critically, neither of the NTF2  
446 domain mutants Y274A nor E302 were correctly targeted and neither protein could  
447 complement the curvature of  $\Delta bd1075$  (Fig 6d-e), highlighting the importance of the  
448 NTF2 domain and residue W303.

449 Together, these targeting data reveal that the NTF2 domain is responsible for  
450 targeting Bd1075 to the outer curve of the bacterial periplasm and that this specific  
451 localization is required to generate cell curvature.

452

453

454

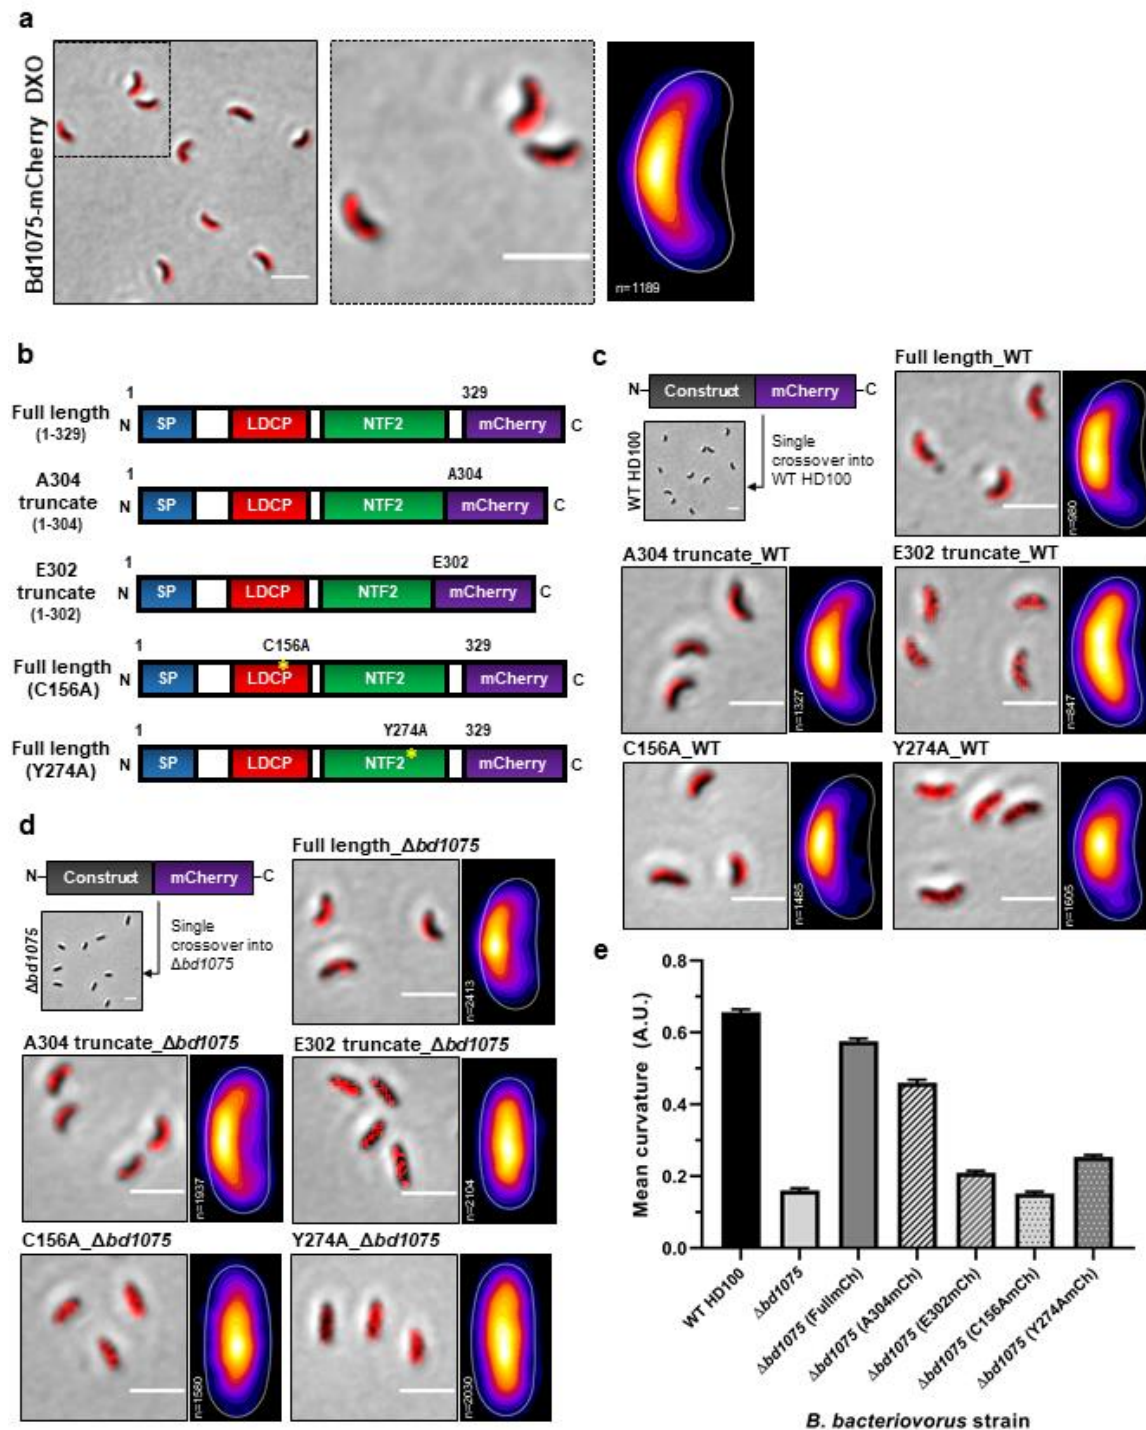

**Fig. 6 The NTF2 domain is required to target Bd1075 to what becomes the convex cell face and generate curvature at that site.**

**a** *B. bacteriovorus* Bd1075-mCherry double-crossover (DXO) attack-phase cells (left), showing the localization of wild-type Bd1075-mCherry to the convex cell face, and representative of 3 biological repeats. Dashed boxed region is shown in a close-up (middle). Scale bars = 2  $\mu$ m. Heatmap (right) depicts the location of wild-type Bd1075-mCherry foci detected in n = 1189 cells from 3 biological

repeats. White-yellow = highest intensity, purple-black = lowest intensity. **b** Schematics of Bd1075-mCherry single-crossover constructs used in **(c-e)**. Full-length: Residues 1-329 (wild-type complete protein) fused to mCherry, A304: Residues 1-304 (contains a completed NTF2 domain including the *B. bacteriovorus*-specific residue W303) fused to mCherry, E302: Residues 1-302 (does not complete the NTF2 domain) fused to mCherry, C156A: Residues 1-329 (full-length with a point mutation of C156A in the catalytic LD-CPase domain) fused to mCherry, and Y274A: Residues 1-329 (full-length with a point mutation of Y274A in the NTF2 domain) fused to mCherry. **c-d** Bd1075-mCherry single-crossover constructs introduced into either *B. bacteriovorus* HD100 **c** wild-type (contains a native wild-type copy of *bd1075*) or **d**  $\Delta bd1075$  (lacking a wild-type copy of *bd1075*). Attack-phase cell images and adjacent heatmaps show targeting of Bd1075-mCherry. Images and heatmaps were generated from 3 biological repeats (n = number of cells analyzed). Scale bars = 2  $\mu\text{m}$ . **e** Curvature measurements of *B. bacteriovorus*  $\Delta bd1075$  attack-phase cells containing different single-crossover Bd1075-mCherry fusions. n = 1886-2812 cells per strain from 3 biological repeats. Error bars represent standard error of the mean. All pairwise comparisons between strains (except for  $\Delta bd1075$  vs  $\Delta bd1075$  (C156mCh) were significant (p<0.0001; Kruskal-Wallis test). Frequency distributions are included in Supplementary Fig. 5c.

455

456

457

458

459

460

461

462

463

464

## 465 Discussion

466 In this work, we elucidate the first vibrioid cell shape-determinant of predatory  
467 *Bdellovibrio bacteriovorus* bacteria and show that vibrioid morphology confers dual  
468 fitness benefits to predators: rapid prey invasion and optimal intracellular growth.  
469 These findings contribute to fundamental knowledge of bacterial cell shape and  
470 deepen our understanding of the predatory process, which may assist the application  
471 of predatory bacteria as a therapeutic.

472 In vibrioid bacteria, intermediate filament-like (IF-like) cyto- or periskeletal elements  
473 frequently determine cell shape<sup>24, 26</sup>. IF-like proteins often contain coiled-coil rich  
474 protein (Ccrp) domains, however deletion of the sole *B. bacteriovorus* Ccrp protein  
475 was previously found not to affect vibrioid cell shape<sup>34</sup>. Here, we discover that the  
476 vibrioid curvature of *B. bacteriovorus* is instead determined by a PG cell wall  
477 hydrolase: Bd1075. Refining the initial prediction of an LDT domain, we show via  
478 sacculus studies that Bd1075 functions as an LD-CPase, cleaving both cross-linked  
479 and uncross-linked tetrapeptides to tripeptides in the predator PG cell wall (Fig. 4 and  
480 Table 1). This enzymatic activity was also observed for LD-CPase helical shape-  
481 determining proteins Csd6 (*H. pylori*) and Pgp2 (*C. jejuni*), highlighting the importance  
482 of biochemical validation of predicted LDT domains.

483 Considering how PG hydrolytic activity generates bacterial cell curvature, it is possible  
484 that targeted LD-CPase-mediated reduction in tetrapeptides may reduce localized  
485 cross-linking by DD- or LD-transpeptidases. Consistent with this idea, the overall  
486 peptide cross-linkage was slightly higher in cells lacking *bd1075* (64.4% compared to  
487 61.1% in wild-type, Table 1). We theorize that a reduction in PG cross-linkage could  
488 soften one side of the PG sacculus such that the cell bulges slightly and becomes

489 deformed by internal cellular turgor pressure which pushes outwards to generate an  
490 outer convex curve that may be fixed by subsequent, as yet uncharacterized, enzyme  
491 activity.

492 *B. bacteriovorus* vibrioid curvature is widely conserved within this group of invasive  
493 predators with the exception of the rod-shaped and long-cultured laboratory strain *B.*  
494 *bacteriovorus* 109J. Originally named *B. bacteriovorus* 109, the strain was re-  
495 designated as 109J following the observation that, in one research laboratory, predator  
496 cells had transitioned from a curved to non-vibrioid shape<sup>35</sup>. It is possible that long-  
497 term laboratory culture conditions in which prey are highly abundant may have  
498 removed the selection pressure for vibrioid morphology, resulting in the lab-evolved  
499 57-residue deletion that we detect to have inactivated Bd1075<sub>109J</sub>. Bd1075<sub>109J</sub> was not  
500 catalytically active upon PG (Supplementary Fig. 8a, Supplementary Fig. 9b, and  
501 Supplementary Table 1) and therefore could not complement curvature when cross-  
502 expressed in HD100  $\Delta bd1075$  (Supplementary Fig. 4). Despite retaining LD-CPase  
503 catalytic residues and targeting capability, the 57-residue N-terminal truncation could  
504 severely disrupt Bd1075<sub>109J</sub> protein folding and therefore function. The mutation most  
505 likely occurred via homologous recombination between 8 bp repeats which flank the  
506 deleted region (Supplementary Fig. 3b); this has been observed in other predator  
507 genes<sup>36</sup>.

508 Bacterial morphology is evolutionarily conserved and known to confer selective  
509 advantages to different bacterial lifestyles<sup>37, 38</sup>. The helical morphology of *H. pylori*, for  
510 example, facilitates efficient bacterial motility through the gastric mucosa to allow  
511 pathogenic colonisation of the gastrointestinal tract<sup>19</sup>. Moreover, rod-shaped mutants  
512 of helical *C. jejuni* are deficient or have reduced fitness in a model of chick  
513 colonisation<sup>21, 22</sup>. In *V. cholerae*, vibrioid cell curvature (which is generated via a

514 different non-enzymatic mechanism) increases motility through dense soft-agar  
515 matrices and promotes the colonisation of *V. cholerae* in motility-dependent mouse  
516 and rat infection models<sup>26</sup>.

517 Here, we propose new phenotypic roles for bacterial cell curvature: invasion and  
518 growth within Gram-negative prey bacteria. Straight rod-shaped *B. bacteriovorus*  
519  $\Delta bd1075$  predators invade prey significantly more slowly than curved wild-type  
520 predators (Fig. 2c). During prey invasion, *B. bacteriovorus* must presumably overcome  
521 opposing physical forces exerted upon itself by the turgid prey membrane and cell  
522 wall. Curved predators may distribute opposing forces as a glancing blow along the  
523 predator cell body, facilitating an efficient, curved trajectory into rounded prey, in  
524 contrast to force-intensive ‘head-on’ invasions by rod-shaped predators.

525 Unlike wild-type curved *B. bacteriovorus*, non-vibrioid  $\Delta bd1075$  predators stretch and  
526 deform the rounded prey bdelloplast (Fig. 3c-e). Intriguingly, non-vibrioid  $\Delta bd1075$   
527 predators become gradually curved during elongation inside spherical prey  
528 bdelloplasts, despite the absence of *bd1075* (Fig. 3a-b). The  $\Delta bd1075$  predator does  
529 not curve as tightly as the wild-type, however, and released progeny cells are not  
530 curved but rod-shaped, indicating that adoption of an intracellular curvature is  
531 temporary in this mutant (Fig. 3a). In wild-type curved predators, *Bd1075* may thus be  
532 acting enzymatically on the *B. bacteriovorus* PG wall to tighten and “fix” a bdelloplast-  
533 imposed curve, consequently avoiding damage to the replicative niche, while also  
534 preparing curved and invasively-streamlined progeny predators for prey exit. This  
535 suggests a sensing and usage by predatory bacteria of the spherical prey environment  
536 - possibly to localize shape-determining enzyme(s) at a topologically-imposed curve  
537 (“curvature-templating”) and initiate the permanent “fixation” of a vibrioid cell shape.



538 This topological-sensing could be a mechanism utilised more generally by bacteria or  
539 alternatively the structural differences of Bd1075 (monomeric, C-terminal extension)  
540 compared to the shape-determinants of free-living helical bacteria could render the  
541 usage of “curvature-templating” predator-specific.

542 Fluorescently-tagged Bd1075 specifically localizes to (what becomes) the outer  
543 convex face of vibrioid *B. bacteriovorus* cells (Fig. 6a). Most cell shape enzymes (for  
544 which localization is known) are found at the inner concave face of bacteria. These  
545 include the *C. crescentus* cytoskeletal polymer crescentin<sup>24</sup> and *Vibrio cholerae* CrvA  
546 and CrvB which form periskeletal polymers<sup>26, 39</sup>. Only Bd1075 and the *H. pylori*  
547 bactofilin CcmA have been identified at the outer convex face of bacterial cells,  
548 occupying the periplasmic and cytoplasmic compartments, respectively<sup>40</sup>.

549 To our knowledge, there is currently no known mechanistic basis for asymmetric  
550 bacterial protein targeting to one lateral side-wall of the cell. Intrigued by this and  
551 guided by the phenotyping of Bd1075 protein truncations and point mutations, we  
552 discover that the extended C-terminal NTF2 domain (including the unique pocket  
553 residue W303) targets the protein to the convex face and is necessary to generate cell  
554 curvature (Fig. 6c-e). NTF2 is a nuclear envelope protein which transports molecules  
555 into eukaryotic nuclei<sup>41</sup>. The NTF2-like domain superfamily, however, comprises  
556 hundreds of thousands of proteins spanning the 3 domains of life and is associated  
557 with over 200 biological pathways, suggestive of divergent evolution<sup>33, 42</sup>.

558 The NTF2 domain of *C. jejuni* Pgp2 was recently found by NMR studies to bind a  
559 variety of PG fragments, with specific secondary structure features shifting upon  
560 complexation<sup>43</sup>. The general agreement of some of the structure of monomeric  
561 Bd1075 with dimeric Pgp2 is suggestive that Bd1075 binds PG. The hydrogen-bond

562 rich nature of the P107/K108 loop we observe in our crystal structure could be  
563 indicative of such an interaction by mimicking part of a PG muropeptide. Since the  
564 Pgp2 study invoked an induced fit on binding PG, it is particularly interesting that the  
565 third helix of the Bd1075 NTF2 domain (nH3, aa 233-248) and associated loop  
566 (labeled “lip”, aa 226-232) are shifted in relation to both Pgp2 and Csd6 (Fig. 5d). This  
567 helix was the major NTF2 feature that was reported to shift upon Pgp2-PG binding<sup>43</sup>.  
568 We postulate that its position has been modified in our Bd1075 structure by sidechains  
569 contacting the P107/K108 loop and may thus represent a “bound” state. There is also  
570 the potential for NTF2:LD-CPase domain crosstalk, given that a small LD-CPase  
571 domain helix (aa 125-132) shifts in response to NTF2 alterations<sup>43</sup>, and in Bd1075  
572 appears to influence the disorder of the adjacent active site lid domain.

573 Since Bd1075 localizes to one lateral side-wall, one could theorize that the PG or outer  
574 membrane properties of that particular side-wall must be uniquely different to the  
575 other. One possibility is that the NTF2 domain recognizes a modification or substrate  
576 which is more abundant at this side-wall. Alternatively, the NTF2 domain may  
577 recognize the temporary physical curvature imposed by growth inside the spherical  
578 bdelloplast (“curvature-templating”) and direct Bd1075 to this curved cell face. Bd1075  
579 may then exert LD-CPase activity, initiating the “fixation” of *B. bacteriovorus* curvature.  
580 Such a possible curvature-templating mechanism is supported by the localization of  
581 Bd1075 (C156A)-mCherry in  $\Delta bd1075$  (Fig. 6d). This construct should be capable of  
582 correct asymmetric localization to one lateral side-wall (but not curvature generation),  
583 however the C156A-mCherry protein remained localized to the cytoplasm of the rod-  
584 shaped  $\Delta bd1075$  attack-phase cells which have been released from bdelloplasts (Fig.  
585 6d). This supports the idea that Bd1075 may sense and localize to temporary  
586 curvature that is templated by the spherical bdelloplast shape. These questions -

587 which would present a significant investigative challenge beyond the scope of this  
588 study - could indicate whether bacteria have evolved to sense the topology of their  
589 physical space environment and use that dynamically to template their final  
590 morphotype during growth and replication.

591 Collectively, these findings advance our understanding of factors affecting the fitness  
592 of therapeutically-promising predatory bacteria and provide new mechanistic insights  
593 into the evolutionary importance of bacterial cell morphology.

594

595

596

597

598

599

600

601

602

603

604

605

606

607

## 608 **Methods**

### 609 **Bacterial strains and culture**

610 *Bdellovibrio bacteriovorus* strains were predatorily cultured in liquid Ca/HEPES buffer  
611 (5.94 g/l HEPES free acid, 0.284 g/l calcium chloride dihydrate, pH 7.6) and on solid  
612 YPSC overlays, both containing *Escherichia coli* S17-1 prey as described previously<sup>44</sup>.  
613 Where appropriate, kanamycin or gentamicin were added to growth media at  
614 concentrations of 50 µg ml<sup>-1</sup> or 5 µg ml<sup>-1</sup>, respectively.

615

### 616 **Plasmid and strain construction**

617 Primers and plasmids used in to construct strains used in this study are detailed in  
618 Supplementary Table 3 and Supplementary Table 4. Strains are listed in  
619 Supplementary Table 5. Bd1075 protein residue numbering was updated to correct for  
620 a previously mis-annotated start codon; the probable true start begins 2 codons  
621 downstream from that originally predicted (Supplementary Fig. 1b). To construct a  
622 markerless deletion of *bd1075*, 1 kb of upstream and downstream DNA were cloned  
623 into the suicide vector pK18*mobsacB* by Gibson assembly<sup>45</sup> using the NEBuilder HiFi  
624 DNA Assembly Cloning Kit (New England Biolabs). The vector was introduced into *B.*  
625 *bacteriovorus* via an *E. coli* S17-1 conjugal donor strain and a double-crossover  
626 deletion mutant was isolated by sucrose suicide counter-selection as described  
627 previously<sup>8, 46</sup>. Deletion of *bd1075* was verified by RT-PCR, Sanger sequencing and  
628 whole-genome sequencing.

629 Strains for complementation tests were constructed by inserting the *bd1075* gene from  
630 either strain HD100 or strain 109J (gene ID: EP01\_15440) plus the respective native  
631 gene promoter into the vector pMQBAD, a derivative of pMQ414 which expresses the  
632 fluorescent tdTomato protein and is capable of autonomous replication in *B.*

633 *bacteriovorus*<sup>47</sup>. Constructs for complementation tests were verified by Sanger  
634 sequencing, conjugated into *B. bacteriovorus* and maintained under a gentamicin  
635 selection pressure.

636 To initially fluorescently-tag Bd1075, the stop codon of *bd1075* was replaced with the  
637 *mCherry* coding sequence to generate an in-frame C-terminal fusion terminating at the  
638 stop codon of the mCherry protein. The fluorescent strain was constructed and verified  
639 analogously to the  $\Delta bd1075$  mutant to generate a markerless double-crossover  
640 Bd1075-mCherry strain. For more extensive analysis of domain functions, single-  
641 crossover mCherry fusions to either full length or truncated versions of Bd1075 were  
642 made. These were constructed by cloning 1 kb of upstream DNA, the DNA encoding  
643 each desired Bd1075 domain-test (minus the stop codon) and the *mCherry* sequence  
644 into pK18*mobsacB*. Point mutations in such constructs were generated using  
645 Q5<sup>®</sup> Site-Directed Mutagenesis (New England Biolabs). Each construct was then  
646 conjugated into *B. bacteriovorus* to generate single-crossover merodiploid strains  
647 which were confirmed by Sanger sequencing and maintained under a kanamycin  
648 selection pressure.

649

## 650 **Protein expression and purification**

651 The *bd1075* gene from *B. bacteriovorus* HD100, minus the signal peptide and stop  
652 codon, was cloned into the vector pET41 in-frame with a C-terminal histidine tag and  
653 transformed into *E. coli* BL21. *E. coli* BL21 was cultured in TB media and incubated at  
654 37 °C with orbital shaking at 200 rpm to an OD<sub>600</sub> of 0.6-0.8. *bd1075* expression was  
655 then induced with 0.5 mM IPTG at 18 °C for 16 h. Bd1075 was purified to near  
656 homogeneity using Ni-NTA affinity and size-exclusion chromatography, then dialyzed  
657 into either buffer containing 10 mM Na Citrate pH 6.0, 30 mM KCl, and 2% w/v glycerol

658 (activity assays) or buffer containing 20 mM Na Citrate pH 6.0, 200 mM NaCl and 2  
659 mM  $\beta$ -mercaptoethanol (structure studies).

660

### 661 **Muropeptide analysis**

662 To culture *B. bacteriovorus* for sacculi isolation, 1 l of each *B. bacteriovorus* strain was  
663 grown on either *E. coli* S17-1 or *E. coli* S17-1 pUC19 (gentamicin-resistant prey for  
664 complementation test strains containing the pMQBAD plasmid). Following complete  
665 predatory lysis of *E. coli* prey during a 24 h incubation at 29 °C with orbital shaking at  
666 200 rpm, *B. bacteriovorus* attack-phase cultures were passed through a 0.45  $\mu$ m filter  
667 to remove any remaining prey debris. To culture *E. coli* BW25113 for sacculi isolation,  
668 *E. coli* was grown at 37 °C for 16 h with orbital shaking at 200 rpm. Cultured *B.*  
669 *bacteriovorus* or *E. coli* cells were then centrifuged at 15,000 g for 30 min at 4 °C,  
670 resuspended in 6 ml of ice-cold PBS, and then boiled in 6 ml of 8% SDS for 30 min to  
671 lyse the cells and liberate sacculi. Peptidoglycan was purified from the cell lysates,  
672 then muropeptides in the supernatant were reduced with sodium borohydride and  
673 HPLC analysis performed as previously described<sup>48</sup>.

674

675 To test the *in vitro* activity of Bd1075<sub>HD100</sub>, sacculi from either *B. bacteriovorus* HD100  
676  $\Delta$ *bd1075*, *B. bacteriovorus* wild-type 109J or *E. coli* BW25113 were incubated with 10  
677  $\mu$ M of *B. bacteriovorus* Bd1075<sub>HD100</sub> in 50 mM Tris-HCl, 50 mM NaCl, pH 7.0 for 16 h  
678 at 37 °C on a thermomixer at 900 rpm. The control sample received no enzyme. To  
679 stop Bd1075 activity, the samples were boiled at 100 °C for 10 min and an equal  
680 volume of 80 mM sodium phosphate, pH 4.8, was added. The samples were incubated  
681 with 10  $\mu$ g of cellosyl (Hoechst, Frankfurt am Main, Germany) for a further 16 h at 37  
682 °C on a thermomixer at 900 rpm, boiled for 10 min and centrifuged at room

683 temperature for 15 min at 16,000 g. Muropeptides present in the supernatant were  
684 reduced with sodium borohydride and analyzed by HPLC as described<sup>48</sup>.

685

## 686 **Structure determination**

687 Purified Bd1075 at ~25 mg/ml was used for screening. Crystals were grown at 18 °C  
688 using the sitting drop technique in 4 µl drops composed of equal volumes of protein  
689 and reservoir solution. B1075 crystals were obtained in the BCS™ screen (Molecular  
690 Dimensions) in condition 2-44, comprising 0.1 M Tris pH 7.8, 0.1 M KSCN, 0.1 M NaBr  
691 and 25% PEG Smear broad range. Crystals were cryo-protected in mother liquor  
692 supplemented with 25% (v/v) ethylene glycol and flash cooled in liquid nitrogen.  
693 Diffraction data were collected at the Diamond Light Source in Oxford, UK  
694 (Supplementary Table 2). Data reduction and processing were completed using XDS<sup>49</sup>  
695 and the xia2 suite<sup>50</sup>. Bd1075 phasing was achieved using a merged SAD data set  
696 (9000 frames, 0.1° oscillations) collected at a wavelength of 0.91 Å corresponding to  
697 the bromide anomalous scattering peak. The collected data were input into CCP4  
698 online CRANK2<sup>51</sup>, which located six bromide sites with an initial FOM of 0.14, followed  
699 by iterative cycles of building and model-based phasing improvement. The obtained  
700 model was further built and modified using COOT<sup>52</sup>, with cycles of refinement in  
701 PHENIX<sup>53</sup>.

702

## 703 **Phase-contrast and epifluorescence microscopy**

704 *B. bacteriovorus* cells were immobilized on a thin 1% Ca/HEPES buffer agarose pad  
705 and visualized under a Nikon Ti-E inverted epifluorescence microscope equipped with  
706 a Plan Apo 100x Ph3 oil objective lens (NA: 1.45), an mCherry filter (excitation: 555

707 nm, emission: 610-665 nm), and an mCerulean3 filter (excitation: 440 nm, emission:  
708 470-490 nm). Images were acquired on an Andor Neo sCMOS camera with Nikon NIS  
709 software. Images were analyzed using the Fiji distribution of ImageJ<sup>54</sup> and minimally  
710 processed using the sharpen and smooth tools, with adjustments to brightness and  
711 contrast. The MicrobeJ plug-in for ImageJ<sup>55</sup> was used to measure cell morphologies  
712 and detect fluorescent foci. *B. bacteriovorus* attack-phase cells were generally  
713 identified by the parameters of area: 0.2-1.5  $\mu\text{m}^2$ , length: 0.5-2.5  $\mu\text{m}$ , width: 0.2-0.8  
714  $\mu\text{m}$ , and circularity: 0-0.9 A.U. For the detection of Bd1075-mCherry fluorescent  
715 fusions in a curved wild-type genetic background, *B. bacteriovorus* cells were defined  
716 with the same parameters, but excluded cells with a curvature of  $<0.6$  so as to only  
717 measure localization in cells with a definitively curved shape. Curvature parameters  
718 were set to 0-max to allow measurements of curvature for fluorescent fusions  
719 expressed in a non-curved  $\Delta bd1075$  genetic background. Fluorescent Bd1075-  
720 mCherry foci within attack-phase *B. bacteriovorus* cells were detected with the foci  
721 method using default maxima settings and an association with parent bacteria with a  
722 tolerance of 0.1  $\mu\text{m}$ . Images were manually inspected to ensure cells had been  
723 correctly detected before measurements were acquired. To analyze prey bdelloplast  
724 morphology, bdelloplasts were generally identified by the parameters of area: 1.0-max  
725  $\mu\text{m}^2$ , length: 0.5-max  $\mu\text{m}$ , width: 0.5-max  $\mu\text{m}$ , and circularity: 0.8-max A.U. *B.*  
726 *bacteriovorus* cells were detected in the maxima channel with the bacteria method  
727 using default maxima settings and an association with parent bacteria with a tolerance  
728 of 0.1  $\mu\text{m}$ . Only the morphologies of prey bdelloplasts which contained a single *B.*  
729 *bacteriovorus* predator were measured.

730

731 **Electron microscopy**



732 *B. bacteriovorus* cells were cultured for 24 h, then concentrated by microcentrifugation  
733 at 5,000 g for 10 min followed by careful resuspension in 1 ml of Ca/HEPES. *B.*  
734 *bacteriovorus* cells were applied to glow-discharged Formvar/Carbon-coated 200-  
735 mesh copper grids (EM Resolutions), stained with 0.5% uranyl acetate for 1 min, then  
736 de-stained with Tris-EDTA pH 7.6 for 30 s. Samples were imaged under a FEI Tecnai  
737 G2 12 Biotwin transmission electron microscope at 100 kV.

738

### 739 **Time-lapse microscopy**

740 For time-lapse microscopy, 1 ml cultures of attack-phase *B. bacteriovorus* and 50  $\mu$ l  
741 of stationary-phase *E. coli* S17-1 were microcentrifuged separately at 17,000 g for 2  
742 min, then resuspended in 50  $\mu$ l of Ca/HEPES. Predators and prey were then mixed  
743 together and immediately transferred to a thin 0.3% Ca/HEPES agarose pad. Cells  
744 were visualized under a Nikon Eclipse E600 upright microscope equipped with a 100x  
745 oil objective lens (NA: 1.25) and a Prior Scientific H101A XYZ stage which allowed 6  
746 specific fields of view to be revisited over the time-lapse sequence. Image frames were  
747 captured every 1 min for at least 2 h on a Hamamatsu Orca ER Camera with Simple  
748 PCI software. Time-lapse videos of *B. bacteriovorus* attaching to and entering *E. coli*  
749 prey were analyzed in Simple PCI software. Attachment time was measured by  
750 counting the number of frames (1 frame = 1 min) between initial irreversible predator  
751 attachment to prey and the first indication of the predator moving into prey. Entry time  
752 was measured by counting the number of frames between the first indication of the  
753 predator moving into prey and the predator residing completely inside the bdelloplast.

754

755

### 756 **Statistical analysis**

757 Statistical analysis was performed in Prism 8.0 (GraphPad). Data were first tested for  
758 normality and then analyzed using an appropriate statistical test. The number of  
759 biological repeats carried out, n values for cell numbers, and the statistical test applied  
760 to the data set are described in each figure legend.

761

#### 762 **Data availability**

763 Coordinates and structure factors have been deposited in the PDB under the accession  
764 code 7O21.

#### 765 **Acknowledgements**

766 This work was funded by a Wellcome Trust PhD studentship (215025/Z/18/Z) to E.J.B., a  
767 Becas Chile studentship (72180329) to M.V-D., a BBSRC studentship to A.W. and  
768 the UKRI Strategic Priorities Fund (<https://www.ukri.org>) EP/T002778/1 to W.V. R.E.S, C.L  
769 and A.L.L are currently funded by a Wellcome Trust Investigator Award in Science  
770 (209437/Z/17/Z). We thank Chloe Hudson for trials of Bd1075 purification, Daniela Vollmer for  
771 purification of PG, Rob Till for general laboratory support, and Block Allocation Group  
772 mx19880 for access to Diamond Synchrotron. Genome sequencing was provided by  
773 MicrobesNG (<http://www.microbesng.uk>) which is supported by the BBSRC (grant number  
774 BB/L024209/1). Electron microscopy was carried out at the Nanoscale and Microscale  
775 Research Centre at the University of Nottingham.

#### 776 **Author contributions**

777 E.J.B. made all deletion, complementation and fluorescent strains of Bd1075, carried out  
778 curvature analysis and conducted electron, time-lapse, and epifluorescence microscopy  
779 experiments with supervision by R.E.S. and C.L. J.B. carried out PG sacculi purifications and  
780 HPLC analysis with supervision by W.V. I.T.C. made the *bd1075* expression construct for  
781 protein purification. A.W purified the protein with purification optimization and protocol design  
782 from I.T.C. M.V-D crystallized and solved the structure of Bd1075. All protein work was

783 supervised by A.L.L. E.J.B., R.E.S. and A.L.L. wrote the manuscript and all co-authors read  
784 and approved the final manuscript.

785 **Competing interests**

786 The authors declare no competing interests.

787 **Additional information**

788 **Supplementary information** is available at [X]

789 **Correspondence** and requests for materials should be addressed to R.E.S.

790

791

792

793

794

795

796

797

798

799

800

801

802

803

804

805

806

807

808

809

810

811

812

813

814

815

816

817 **References**

818

819 1. Stolp H, Starr MP. *Bdellovibrio bacteriovorus* gen. et sp. n., a predatory,  
820 ectoparasitic, and bacteriolytic microorganism. *Antonie Van Leeuwenhoek* **29**, 217-  
821 248 (1963).

822

823 2. Dashiff A, Junka RA, Libera M, Kadouri DE. Predation of human pathogens by the  
824 predatory bacteria *Micavibrio aeruginosavorus* and *Bdellovibrio bacteriovorus*. *J.*  
825 *Appl. Microbiol.* **110**, 431-444 (2011).

826

827 3. Kadouri DE, To K, Shanks RM, Doi Y. Predatory bacteria: a potential ally against  
828 multidrug-resistant Gram-negative pathogens. *PLoS One* **8**, e63397 (2013).

829

830 4. Atterbury RJ, *et al.* Effects of orally administered *Bdellovibrio bacteriovorus* on the  
831 well-being and *Salmonella* colonization of young chicks. *Appl Environ Microbiol* **77**,  
832 5794-5803 (2011).

833

834 5. Shatzkes K, *et al.* Predatory bacteria attenuate *Klebsiella pneumoniae* burden in rat  
835 lungs. *MBio* **7**, (2016).

836

837 6. Willis AR, *et al.* Injections of predatory bacteria work alongside host immune cells to  
838 treat *Shigella* infection in zebrafish larvae. *Curr. Biol.* **26**, 3343-3351 (2016).

839

840 7. Silhavy TJ, Kahne D, Walker S. The bacterial cell envelope. *Cold Spring Harb.*  
841 *Perspect. Biol.* **2**, a000414 (2010).

842

843 8. Lerner TR, *et al.* Specialized peptidoglycan hydrolases sculpt the intra-bacterial niche  
844 of predatory *Bdellovibrio* and increase population fitness. *PLoS Pathog.* **8**, e1002524  
845 (2012).

846

847 9. Lambert C, *et al.* Interrupting peptidoglycan deacetylation during *Bdellovibrio*  
848 predator-prey interaction prevents ultimate destruction of prey wall, liberating  
849 bacterial-ghosts. *Sci. Rep.* **6**, 26010 (2016).

850

851 10. Kuru E, *et al.* Fluorescent D-amino-acids reveal bi-cellular cell wall modifications  
852 important for *Bdellovibrio bacteriovorus* predation. *Nat Microbiol* **2**, 1648-1657  
853 (2017).

854

855 11. Harding CJ, *et al.* A lysozyme with altered substrate specificity facilitates prey cell  
856 exit by the periplasmic predator *Bdellovibrio bacteriovorus*. *Nat Commun* **11**, 4817  
857 (2020).

858

859 12. Shilo M. Morphological and physiological aspects of the interaction of *Bdellovibrio*  
860 with host bacteria. *Curr Top Microbiol Immunol* **50**, 174-204 (1969).

861

862 13. Lambert C, Fenton AK, Hogley L, Sockett RE. Predatory *Bdellovibrio* bacteria use  
863 gliding motility to scout for prey on surfaces. *J. Bacteriol.* **193**, 3139-3141 (2011).

- 864  
865 14. Matin A, Rittenberg SC. Kinetics of deoxyribonucleic acid destruction and synthesis  
866 during growth of *Bdellovibrio bacteriovorus* strain 109D on *Pseudomonas putida* and  
867 *Escherichia coli*. *J. Bacteriol.* **111**, 664-673 (1972).
- 868  
869 15. Hespell RB, Miozzari GF, Rittenberg SC. Ribonucleic acid destruction and synthesis  
870 during intraperiplasmic growth of *Bdellovibrio bacteriovorus*. *J. Bacteriol.* **123**, 481-  
871 491 (1975).
- 872  
873 16. Ruby EG, McCabe JB, Barke JI. Uptake of intact nucleoside monophosphates by  
874 *Bdellovibrio bacteriovorus* 109J. *J. Bacteriol.* **163**, 1087-1094 (1985).
- 875  
876 17. Wyckoff TJ, Taylor JA, Salama NR. Beyond growth: novel functions for bacterial cell  
877 wall hydrolases. *Trends Microbiol.* **20**, 540-547 (2012).
- 878  
879 18. Sycuro LK, *et al.* Flow cytometry-based enrichment for cell shape mutants identifies  
880 multiple genes that influence *Helicobacter pylori* morphology. *Mol. Microbiol.* **90**, 869-  
881 883 (2013).
- 882  
883 19. Sycuro LK, *et al.* Peptidoglycan crosslinking relaxation promotes *Helicobacter pylori*'s  
884 helical shape and stomach colonization. *Cell* **141**, 822-833 (2010).
- 885  
886 20. Sycuro LK, *et al.* Multiple peptidoglycan modification networks modulate *Helicobacter*  
887 *pylori*'s cell shape, motility, and colonization potential. *PLoS Pathog.* **8**, e1002603  
888 (2012).
- 889  
890 21. Frirdich E, *et al.* Peptidoglycan LD-carboxypeptidase Pgp2 influences *Campylobacter*  
891 *jejuni* helical cell shape and pathogenic properties and provides the substrate for the  
892 DL-carboxypeptidase Pgp1. *J. Biol. Chem.* **289**, 8007-8018 (2014).
- 893  
894 22. Frirdich E, *et al.* Peptidoglycan-modifying enzyme Pgp1 is required for helical cell  
895 shape and pathogenicity traits in *Campylobacter jejuni*. *PLoS Pathog.* **8**, e1002602  
896 (2012).
- 897  
898 23. Min K, *et al.* Peptidoglycan reshaping by a noncanonical peptidase for helical cell  
899 shape in *Campylobacter jejuni*. *Nat Commun* **11**, 458 (2020).
- 900  
901 24. Ausmees N, Kuhn JR, Jacobs-Wagner C. The bacterial cytoskeleton: an intermediate  
902 filament-like function in cell shape. *Cell* **115**, 705-713 (2003).
- 903  
904 25. Cabeen MT, *et al.* Bacterial cell curvature through mechanical control of cell growth.  
905 *EMBO J.* **28**, 1208-1219 (2009).
- 906  
907 26. Bartlett TM, *et al.* A periplasmic polymer curves *Vibrio cholerae* and promotes  
908 pathogenesis. *Cell* **168**, 172-185 e115 (2017).
- 909

- 910 27. Almagro Armenteros JJ, *et al.* SignalP 5.0 improves signal peptide predictions using  
911 deep neural networks. *Nat. Biotechnol.* **37**, 420-423 (2019).
- 912  
913 28. Kim HS, *et al.* The cell shape-determining Csd6 protein from *Helicobacter pylori*  
914 constitutes a new family of L,D-carboxypeptidase. *J. Biol. Chem.* **290**, 25103-25117  
915 (2015).
- 916  
917 29. Raghunathan D, *et al.* Engulfment, persistence and fate of *Bdellovibrio bacteriovorus*  
918 predators inside human phagocytic cells informs their future therapeutic potential.  
919 *Sci. Rep.* **9**, 4293 (2019).
- 920  
921 30. Vollmer W, Joris B, Charlier P, Foster S. Bacterial peptidoglycan (murein)  
922 hydrolases. *FEMS Microbiol. Rev.* **32**, 259-286 (2008).
- 923  
924 31. Bahadur R, Chodiseti PK, Reddy M. Cleavage of Braun's lipoprotein Lpp from the  
925 bacterial peptidoglycan by a paralog of L,d-transpeptidases, LdtF. *Proc. Natl. Acad.*  
926 *Sci. U. S. A.* **118**, (2021).
- 927  
928 32. Winkle M, *et al.* DpaA detaches Braun's lipoprotein from peptidoglycan. *MBio* **12**,  
929 (2021).
- 930  
931 33. Eberhardt RY, *et al.* Filling out the structural map of the NTF2-like superfamily. *BMC*  
932 *Bioinformatics* **14**, 327 (2013).
- 933  
934 34. Fenton AK, Hogley L, Butan C, Subramaniam S, Sockett RE. A coiled-coil-repeat  
935 protein 'Ccrp' in *Bdellovibrio bacteriovorus* prevents cellular indentation, but is not  
936 essential for vibroid cell morphology. *FEMS Microbiol. Lett.* **313**, 89-95 (2010).
- 937  
938 35. Rittenberg SC. Nonidentity of *Bdellovibrio bacteriovorus* strains 109D and 109J. *J.*  
939 *Bacteriol.* **109**, 432-433 (1972).
- 940  
941 36. Cotter TW, Thomashow MF. Identification of a *Bdellovibrio bacteriovorus* genetic  
942 locus, *hit*, associated with the host-independent phenotype. *J. Bacteriol.* **174**, 6018-  
943 6024 (1992).
- 944  
945 37. Young KD. The selective value of bacterial shape. *Microbiol Mol Biol Rev* **70**, 660-  
946 703 (2006).
- 947  
948 38. Yang DC, Blair KM, Salama NR. Staying in shape: the impact of cell shape on  
949 bacterial survival in diverse environments. *Microbiol Mol Biol Rev* **80**, 187-203  
950 (2016).
- 951  
952 39. Martin NR, Blackman E, Bratton BP, Bartlett TM, Gitai Z. The evolution of bacterial  
953 shape complexity by a curvature-inducing module. *bioRxiv*  
954 <https://doi.org/10.1101/2020.02.20.954503>, (2020).
- 955

- 956 40. Taylor JA, *et al.* Distinct cytoskeletal proteins define zones of enhanced cell wall  
957 synthesis in *Helicobacter pylori*. *elife* **9**, (2020).
- 958  
959 41. Corbett AH, Silver PA. The NTF2 gene encodes an essential, highly conserved  
960 protein that functions in nuclear transport *in vivo*. *J. Biol. Chem.* **271**, 18477-18484  
961 (1996).
- 962  
963 42. Mitchell AL, *et al.* InterPro in 2019: improving coverage, classification and access to  
964 protein sequence annotations. *Nucleic Acids Res.* **47**, D351-D360 (2019).
- 965  
966 43. Sheng-Huei Lin C, *et al.* Peptidoglycan binding by a pocket on the accessory NTF2-  
967 domain of Pgp2 directs helical cell shape of *Campylobacter jejuni*. *J. Biol. Chem.*,  
968 100528 (2021).
- 969  
970 44. Lambert C, Sockett RE. Laboratory maintenance of *Bdellovibrio*. *Curr. Protoc.*  
971 *Microbiol.* **Chapter 7**, Unit 7B 2 (2008).
- 972  
973 45. Gibson DG, Young L, Chuang RY, Venter JC, Hutchison CA, 3rd, Smith HO.  
974 Enzymatic assembly of DNA molecules up to several hundred kilobases. *Nat.*  
975 *Methods* **6**, 343-345 (2009).
- 976  
977 46. Lambert C, Sockett RE. Nucleases in *Bdellovibrio bacteriovorus* contribute towards  
978 efficient self-biofilm formation and eradication of preformed prey biofilms. *FEMS*  
979 *Microbiol. Lett.* **340**, 109-116 (2013).
- 980  
981 47. Mukherjee S, Brothers KM, Shanks RMQ, Kadouri DE. Visualizing *Bdellovibrio*  
982 *bacteriovorus* by using the tdTomato fluorescent protein. *Appl Environ Microbiol* **82**,  
983 1653-1661 (2015).
- 984  
985 48. Glauner B. Separation and quantification of muropeptides with high-performance  
986 liquid chromatography. *Anal. Biochem.* **172**, 451-464 (1988).
- 987  
988 49. Kabsch W. XDS. *Acta Crystallogr. D Biol. Crystallogr.* **66**, 125-132 (2010).
- 989  
990 50. Winter G. xia2: an expert system for macromolecular crystallography data reduction.  
991 *Journal of Applied Crystallography* **43**, 186-190 (2010).
- 992  
993 51. Skubak P, Pannu NS. Automatic protein structure solution from weak X-ray data. *Nat*  
994 *Commun* **4**, 2777 (2013).
- 995  
996 52. Emsley P, Cowtan K. Coot: model-building tools for molecular graphics. *Acta*  
997 *Crystallogr. D Biol. Crystallogr.* **60**, 2126-2132 (2004).
- 998  
999 53. Zwart PH, *et al.* Automated structure solution with the PHENIX suite. *Methods Mol.*  
1000 *Biol.* **426**, 419-435 (2008).
- 1001

- 1002 54. Schindelin J, *et al.* Fiji: an open-source platform for biological-image analysis. *Nat.*  
1003 *Methods* **9**, 676-682 (2012).
- 1004  
1005 55. Ducret A, Quardokus EM, Brun YV. MicrobeJ, a tool for high throughput bacterial cell  
1006 detection and quantitative analysis. *Nat Microbiol* **1**, 16077 (2016).
- 1007  
1008
